# Supplementary material for: K2CO3 promoted direct sulfenylation of indoles: a facile approach towards 3-sulfenylindoles
Source: Royal Society of Chemistry journal article supplement (doi:10.1039/c3gc40724a), 2013-01-01
Supplement: c3gc40724a.pdf [file c3gc40724a.pdf]

## Supporting Information

### **K<sub>2</sub>CO<sub>3</sub> Promoted Direct Sulfenylation of Indoles: A Facile Approach of 3-Sulfenylindoles**

Peng Sang,<sup>a</sup> Zhengkai Chen,<sup>a</sup> Jianwei Zou,<sup>a,b</sup> and Yuhong Zhang\*<sup>a,c</sup>

<sup>a</sup> Department of Chemistry, ZJU-NHU United R&D Center, Zhejiang University, Hangzhou 310027, China.

<sup>b</sup> Ningbo Institute of Technology, Zhejiang University, Ningbo 315104, China.

<sup>c</sup> State Key Laboratory of Applied Organic Chemistry, Lanzhou University, Lanzhou 730000, China.

Email : [yhzhang@zju.edu.cn](mailto:yhzhang@zju.edu.cn)

#### Table of contents

|                                                                                    |     |
|------------------------------------------------------------------------------------|-----|
| General experimental procedures.....                                               | S2  |
| General procedure for synthesis of 3-sulfenylindoles ( <b>3</b> ).....             | S2  |
| Characterization data of compounds <b>3a-3v</b> .....                              | S2  |
| References.....                                                                    | S12 |
| The <sup>1</sup> H and <sup>13</sup> C NMR spectra of compounds <b>3a-3v</b> ..... | S13 |

## General experimental procedures

Unless otherwise stated, all reactions were carried out under air, all reagents and solvents were obtained from commercial sources and used without any further purification.  $^1\text{H}$  NMR spectra were recorded at 400 MHz using TMS as internal standard.  $^{13}\text{C}$  NMR spectra were recorded at 100 MHz using TMS as internal standard. The multiplicities are reported as follows: singlet (s), doublet (d), doublet of doublets (dd), triplet (t), quartet (q), multiplet (m). Coupling constants are reported in Hertz (Hz). Mass spectroscopy data were collected on HRMS-EI and HRMS-ESI instrument.

### General procedure for synthesis of 3-sulfenylindoles (3)

A 25 mL flask equipped with a magnetic stirring bar was charged with substituted indoles (**1**, 0.5 mmol), disulfides (**2**, 0.5 mmol) and  $\text{K}_2\text{CO}_3$  (0.25 mmol) in DMSO (2 mL). The mixture was allowed to stir under open atmosphere at 100 °C for 9 h. Saturated aqueous NaCl (20 mL), and EtOAc (20 mL) were added to the cooled reaction mixture successively. The organic phase was separated, and the aqueous phase was further extracted with EtOAc ( $2 \times 20$  mL). The combined organic layers were dried over anhydrous  $\text{Na}_2\text{SO}_4$  and concentrated. The residue was purified by column chromatography on silica gel using petroleum ether/ ethyl acetate (10:1) as eluent to provide the desired products.

### Characterization data of compounds 3a-3v

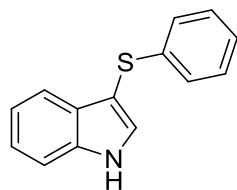

**3a**

**3-(Phenylthio)-1H-indole (3a).**<sup>1</sup> Eluent: petroleum ether / ethyl acetate (10:1). White solid.  $^1\text{H}$  NMR (DMSO- $d_6$ , 400 MHz)  $\delta$  11.76 (s, 1H), 7.81 (d, 1H,  $J = 1.2$  Hz), 7.55 (d, 1H,  $J = 8.0$  Hz), 7.46 (d, 1H,  $J = 8.0$  Hz), 7.16-7.22 (m, 3H), 7.03-7.10 (m, 4H).  $^{13}\text{C}$  NMR (DMSO- $d_6$ , 100 MHz)  $\delta$  139.3, 136.8, 132.4, 128.8, 128.7, 125.3, 124.7, 122.1, 120.1, 118.3, 112.4, 99.3.

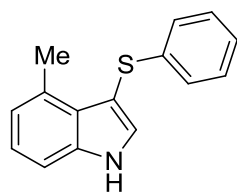

**3b**

**4-Methyl-3-(phenylthio)-1H-indole (3b)** [New compound]. Eluent: petroleum ether / ethyl acetate (20:1). Brown oil.  $^1\text{H}$  NMR ( $\text{CDCl}_3$ , 400 MHz)  $\delta$  8.23 (s, 1H), 7.26 (d, 1H,  $J = 2.4$  Hz), 7.08-7.16 (m, 4H), 6.98-7.04 (m, 3H), 6.86 (d, 1H,  $J = 7.2$  Hz), 2.62 (s, 3H).  $^{13}\text{C}$  NMR ( $\text{CDCl}_3$ , 100 MHz)  $\delta$  141.7, 137.1, 132.1, 129.0, 127.1, 125.3, 124.7, 123.2, 122.6, 109.8, 102.1, 18.8. HRMS (EI) Calcd for  $\text{C}_{15}\text{H}_{13}\text{NS}$  ( $\text{M}^+$ ) 239.0769; Found, 239.0769.

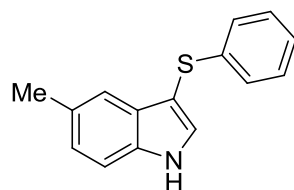

**3c**

**5-methyl-3-(phenylthio)-1H-indole (3c)**.<sup>4</sup> Eluent: petroleum ether / ethyl acetate (10:1). White solid.  $^1\text{H}$  NMR ( $\text{DMSO-d}_6$ , 400 MHz)  $\delta$  11.64 (s, 1H), 7.74 (s, 1H), 7.43 (d, 1H,  $J = 8.4$  Hz), 7.26 (s, 1H), 7.16-7.19 (m, 2H), 7.02-7.05 (m, 4H), 2.34 (s, 3H).  $^{13}\text{C}$  NMR ( $\text{DMSO-d}_6$ , 100 MHz)  $\delta$  139.5, 135.1, 132.5, 129.0, 128.8, 128.8, 125.1, 124.6, 123.8, 117.8, 112.1, 98.5, 21.2.

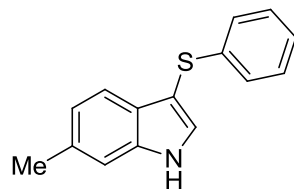

**3d**

**6-Methyl-3-(phenylthio)-1H-indole (3d)**.<sup>5</sup> Eluent: petroleum ether / ethyl acetate (10:1). White solid.  $^1\text{H}$  NMR ( $\text{DMSO-d}_6$ , 400 MHz)  $\delta$  11.59 (s, 1H), 7.70 (s, 1H), 7.30-7.33 (m, 2H), 7.15-7.19 (m, 2H), 7.04 (d, 3H,  $J = 7.2$  Hz), 6.91 (d, 1H,  $J = 8.0$

Hz), 2.41 (s, 3H).  $^{13}\text{C}$  NMR (DMSO- $d_6$ , 100 MHz)  $\delta$  139.4, 137.2, 131.7, 131.4, 128.7, 126.6, 125.2, 124.6, 121.9, 118.1, 112.1, 99.1, 21.3.

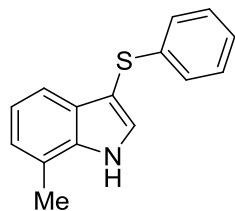

**3e**

**7-Methyl-3-(phenylthio)-1H-indole (3e).**<sup>6</sup> Eluent: petroleum ether / ethyl acetate (10:1). Brown oil.  $^1\text{H}$  NMR ( $\text{CDCl}_3$ , 400 MHz)  $\delta$  8.12 (s, 1H), 7.44 (d, 1H,  $J = 7.2$  Hz), 7.28 (s, 1H), 7.06-7.12 (m, 4H), 7.00-7.05 (m, 3H), 2.40 (s, 3H).  $^{13}\text{C}$  NMR ( $\text{CDCl}_3$ , 100 MHz)  $\delta$  139.5, 136.2, 130.7, 128.9, 128.8, 126.0, 124.9, 123.7, 121.2, 121.1, 117.4, 103.0, 16.6.

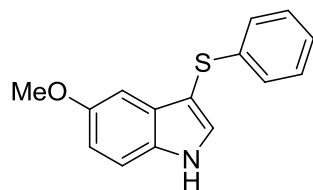

**3f**

**5-Methoxy-3-(phenylthio)-1H-indole (3f).**<sup>1</sup> Eluent: petroleum ether / ethyl acetate (5:1). Brown oil.  $^1\text{H}$  NMR ( $\text{CDCl}_3$ , 400 MHz)  $\delta$  8.37 (s, 1H), 7.30 (s, 1H), 7.20 (s, 1H,  $J = 8.8$  Hz), 7.07-7.16 (m, 4H), 7.00-7.04 (m, 2H), 6.88 (d, 1H,  $J = 8.8$  Hz), 3.72 (s, 3H).  $^{13}\text{C}$  NMR ( $\text{CDCl}_3$ , 100 MHz)  $\delta$  155.1, 139.5, 131.7, 131.5, 130.0, 128.9, 125.8, 124.9, 113.6, 112.7, 101.9, 100.9, 55.9.

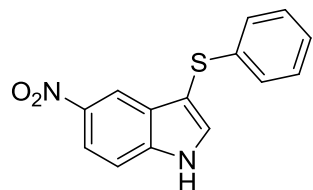

**3g**

**5-Nitro-3-(phenylthio)-1H-indole (3g)** [New compound]. Eluent: petroleum ether / ethyl acetate (5:1). Yellow solid.  $^1\text{H}$  NMR (DMSO- $d_6$ , 400 MHz)  $\delta$  12.42 (s, 1H), 8.27 (s, 1H), 8.06 (d, 2H,  $J = 9.2$  Hz), 7.68 (d, 1H,  $J = 9.2$  Hz), 7.17-7.21 (m, 2H), 7.06 (d, 3H,  $J = 7.2$  Hz).  $^{13}\text{C}$  NMR (DMSO- $d_6$ , 100 MHz)  $\delta$  141.5, 140.0, 138.0, 136.4, 129.0, 128.2, 125.7, 125.2, 117.5, 114.8, 113.1, 102.8. HRMS (EI) Calcd for  $\text{C}_{14}\text{H}_{10}\text{N}_2\text{O}_2\text{S}$  (M) $^+$  270.0463; Found, 270.0466.

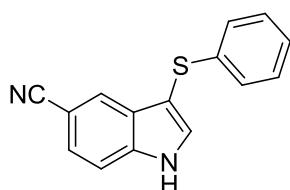

**3h**

**3-(Phenylthio)-1H-indole-5-carbonitrile (3h)**.<sup>3</sup> Eluent: petroleum ether / ethyl acetate (5:1). Yellow solid.  $^1\text{H}$  NMR (DMSO- $d_6$ , 400 MHz)  $\delta$  12.29 (s, 1H), 8.02 (d, 1H,  $J = 1.6$  Hz), 7.86 (s, 1H), 7.70 (d, 1H,  $J = 8.4$  Hz), 7.54 (d, 1H,  $J = 8.4$  Hz), 7.19 (t, 2H,  $J = 7.6$  Hz), 7.07 (t, 3H,  $J = 7.6$  Hz).  $^{13}\text{C}$  NMR (DMSO- $d_6$ , 100 MHz)  $\delta$  138.6, 138.2, 135.2, 128.9, 128.6, 125.8, 125.2, 125.0, 123.6, 120.2, 113.8, 102.5, 101.2.

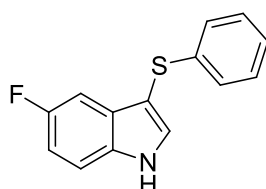

**3i**

**5-Fluoro-3-(phenylthio)-1H-indole (3i)** [New compound]. Eluent: petroleum ether / ethyl acetate (10:1). White solid.  $^1\text{H}$  NMR (DMSO- $d_6$ , 400 MHz)  $\delta$  11.88 (s, 1H), 7.88 (s, 1H), 7.53-7.56 (dt, 1H,  $J = 4.4$  Hz, 4.4 Hz), 7.17-7.20 (t, 2H,  $J = 7.6$  Hz), 7.13 (d, 1H,  $J = 9.2$  Hz), 7.04-7.07 (m, 4H).  $^{13}\text{C}$  NMR (DMSO- $d_6$ , 100 MHz)  $\delta$  157.7 ( $J_{CF} = 233.4$  Hz), 138.8, 134.4, 133.3, 129.4 ( $J_{CF} = 9.8$  Hz), 128.8, 125.4, 124.9, 112.1 ( $J_{CF} = 310.6$  Hz), 112.0 ( $J_{CF} = 326.9$  Hz), 103.0 ( $J_{CF} = 24.5$  Hz), 99.6 ( $J_{CF} = 4.3$  Hz). HRMS (EI) Calcd for  $\text{C}_{14}\text{H}_{10}\text{NOF}$  (M) $^+$  243.0518; Found, 243.0516.

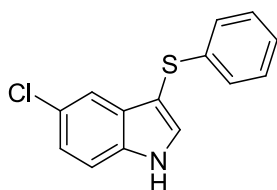

**3j**

**5-Chloro-3-(phenylthio)-1H-indole (3j).**<sup>4</sup> Eluent: petroleum ether / ethyl acetate (10:1). White solid. <sup>1</sup>H NMR (DMSO-d<sub>6</sub>, 400 MHz) δ 11.95 (s, 1H), 7.89 (s, 1H), 7.56 (d, 1H, *J* = 8.4 Hz), 7.40 (s, 1H), 7.17-7.21 (m, 3H), 7.03-7.08 (m, 3H). <sup>13</sup>C NMR (DMSO-d<sub>6</sub>, 100 MHz) δ 138.7, 135.2, 134.2, 130.0, 128.9, 125.4, 125.0, 124.9, 122.2, 117.4, 114.1, 99.3.

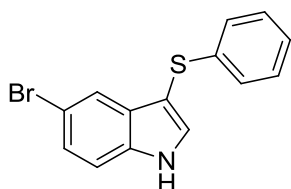

**3k**

**5-Bromo-3-(phenylthio)-1H-indole (3k).**<sup>1</sup> Eluent: petroleum ether / ethyl acetate (10:1). White solid. <sup>1</sup>H NMR (DMSO-d<sub>6</sub>, 400 MHz) δ 11.97 (s, 1H), 7.87 (s, 1H), 7.56 (s, 1H), 7.51 (d, 1H, *J* = 8.4 Hz), 7.31 (d, 1H, *J* = 8.4 Hz), 7.17-7.20 (m, 2H), 7.03-7.07 (m, 3H). <sup>13</sup>C NMR (DMSO-d<sub>6</sub>, 100 MHz) δ 138.7, 135.5, 134.1, 130.6, 128.9, 125.4, 124.9, 124.8, 120.4, 114.5, 113.0, 99.2.

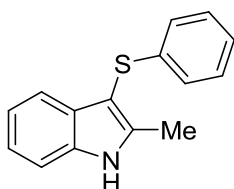

**3l**

**2-Methyl-3-(phenylthio)-1H-indole (3l).**<sup>1</sup> Eluent: petroleum ether / ethyl acetate (10:1). Brown solid. <sup>1</sup>H NMR (DMSO-d<sub>6</sub>, 400 MHz) δ 11.71 (s, 1H), 7.45 (d, 1H, *J* = 8.4 Hz), 7.40 (d, 1H, *J* = 7.6 Hz), 7.12-7.18 (m, 3H), 7.00-7.06 (m, 4H), 2.50 (s, 3H).

$^{13}\text{C}$  NMR (DMSO- $d_6$ , 100 MHz)  $\delta$  142.1, 139.2, 135.7, 129.7, 128.8, 125.0, 124.5, 121.4, 119.9, 117.7, 111.3, 96.4, 11.7.

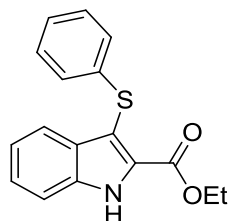

**3m**

**Ethyl 3-(phenylthio)-1H-indole-2-carboxylate (3m).**<sup>2</sup> Eluent: petroleum ether / ethyl acetate (10:1). White solid.  $^1\text{H}$  NMR (DMSO- $d_6$ , 400 MHz)  $\delta$  9.73 (s, 1H), 7.62 (d, 1H,  $J = 8.0$  Hz), 7.44 (d, 1H,  $J = 8.4$  Hz), 7.33 (t, 1H,  $J = 7.6$  Hz), 7.06-7.17 (m, 6H), 4.40 (q, 2H,  $J = 7.2$  Hz), 1.29 (t, 3H,  $J = 7.2$  Hz).  $^{13}\text{C}$  NMR (DMSO- $d_6$ , 100 MHz)  $\delta$  161.7, 138.1, 136.0, 130.1, 128.9, 128.8, 127.2, 126.1, 125.3, 121.7, 121.5, 112.3, 110.4, 61.6, 14.2.

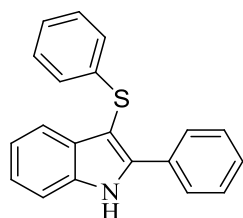

**3n**

**2-Phenyl-3-(phenylthio)-1H-indole (3n).**<sup>2</sup> Eluent: petroleum ether / ethyl acetate (10:1). yellow oil.  $^1\text{H}$  NMR ( $\text{CDCl}_3$ , 400 MHz)  $\delta$  8.74 (s, 1H), 7.60-7.65 (m, 3H), 7.28-7.32 (m, 4H), 7.18 (d, 1H,  $J = 6.4$  Hz), 7.07-7.10 (m, 5H), 6.97 (s, 1H).  $^{13}\text{C}$  NMR ( $\text{CDCl}_3$ , 100 MHz)  $\delta$  142.3, 139.5, 136.1, 131.5, 131.3, 129.0, 128.8, 128.8, 128.4, 125.7, 124.8, 123.4, 121.2, 120.0, 111.5, 99.1.

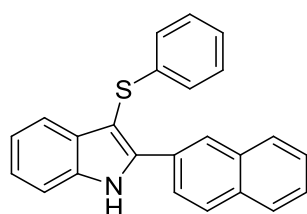

### 3o

**2-(Naphthalen-2-yl)-3-(phenylthio)-1H-indole (3o)** [New compound]. Eluent: petroleum ether / ethyl acetate (10:1). White solid.  $^1\text{H}$  NMR (DMSO- $d_6$ , 400 MHz)  $\delta$  12.36 (s, 1H), 8.50 (s, 1H), 8.16 (d, 1H,  $J = 8.4$  Hz), 7.99 (d, 1H,  $J = 8.8$  Hz), 7.92 (d, 2H,  $J = 4.0$  Hz), 7.68 (d, 1H,  $J = 8.0$  Hz), 7.60 (d, 1H,  $J = 8.0$  Hz), 7.52-7.54 (m, 2H), 7.30 (t, 1H,  $J = 7.6$  Hz), 7.13-7.22 (m, 5H), 7.05 (t, 1H,  $J = 6.8$  Hz).  $^{13}\text{C}$  NMR (DMSO- $d_6$ , 100 MHz)  $\delta$  142.0, 139.1, 136.5, 132.7, 132.6, 130.8, 129.0, 128.9, 128.1, 128.0, 127.6, 127.4, 126.7, 126.7, 125.9, 125.2, 124.8, 122.9, 120.6, 118.8, 112.1, 97.3. HRMS (EI) Calcd for  $\text{C}_{24}\text{H}_{17}\text{NS}$  (M) $^+$  351.1082; Found, 351.1086.

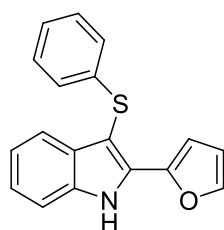

### 3p

**2-(Furan-2-yl)-3-(phenylthio)-1H-indole (3p)** [New compound]. Eluent: petroleum ether / ethyl acetate (10:1). Brown solid.  $^1\text{H}$  NMR (DMSO- $d_6$ , 400 MHz)  $\delta$  12.26 (s, 1H), 7.87 (s, 1H), 7.56 (d, 1H,  $J = 8.0$  Hz), 7.51 (d, 1H,  $J = 8.0$  Hz), 7.16-7.24 (m, 3H), 7.08-7.12 (m, 2H), 7.05 (d, 3H,  $J = 7.6$  Hz), 6.63 (s, 1H).  $^{13}\text{C}$  NMR (DMSO- $d_6$ , 100 MHz)  $\delta$  145.7, 143.1, 138.0, 136.1, 133.0, 130.4, 129.0, 125.3, 124.9, 122.9, 120.7, 118.4, 112.3, 112.2, 109.7, 95.8. HRMS (EI) Calcd for  $\text{C}_{18}\text{H}_{13}\text{NOS}$  (M) $^+$  291.0718; Found, 291.0714.

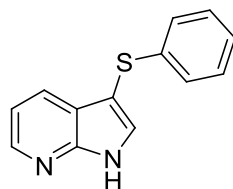

### 3q

**3-(Phenylthio)-1H-pyrrolo[2,3-*b*]pyridine (3q)**.<sup>7</sup> Eluent: petroleum ether / ethyl acetate (2:1). White solid.  $^1\text{H}$  NMR (DMSO- $d_6$ , 400 MHz)  $\delta$  12.35 (s, 1H), 8.32 (s,



1H), 7.95 (s, 1H), 7.79 (d, 1H,  $J = 7.6$  Hz), 7.15-7.18 (m, 2H), 7.08-7.11 (m, 1H), 7.04 (d, 3H,  $J = 8.0$  Hz).  $^{13}\text{C}$  NMR (DMSO- $d_6$ , 100 MHz)  $\delta$  148.9, 143.6, 138.6, 133.2, 128.9, 126.7, 125.5, 125.0, 121.0, 116.6, 98.7.

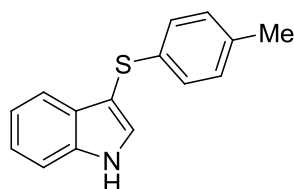

**3r**

**3-(*p*-tolylthio)-1H-indole (3r).**<sup>1</sup> Eluent: petroleum ether / ethyl acetate (10:1). White solid.  $^1\text{H}$  NMR (DMSO- $d_6$ , 400 MHz)  $\delta$  11.71 (s, 1H), 7.77 (d, 1H,  $J = 2.4$  Hz), 7.54 (d, 1H,  $J = 8.4$  Hz), 7.45 (d, 1H,  $J = 7.6$  Hz), 7.19 (t, 1H,  $J = 8.0$  Hz), 7.07 (t, 1H,  $J = 7.2$  Hz), 6.98 (s, 4H), 2.18 (s, 3H).  $^{13}\text{C}$  NMR (DMSO- $d_6$ , 100 MHz)  $\delta$  136.7, 135.5, 134.1, 132.1, 129.4, 128.7, 125.8, 122.1, 120.0, 118.4, 112.3, 100.1, 20.4.

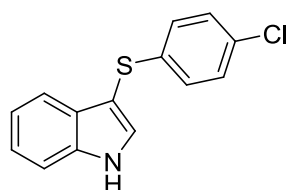

**3s**

**3-(4-Chlorophenylthio)-1H-indole (3s).**<sup>1</sup> Eluent: petroleum ether / ethyl acetate (10:1). White solid.  $^1\text{H}$  NMR (DMSO- $d_6$ , 400 MHz)  $\delta$  11.80 (s, 1H), 7.81 (s, 1H), 7.55 (d, 1H,  $J = 8.4$  Hz), 7.43 (d, 1H,  $J = 7.6$  Hz), 7.18-7.23 (m, 3H), 7.08 (t, 1H,  $J = 7.6$  Hz), 7.03 (d, 2H,  $J = 8.0$  Hz).  $^{13}\text{C}$  NMR (DMSO- $d_6$ , 100 MHz)  $\delta$  138.4, 136.8, 132.6, 129.3, 128.7, 128.4, 126.8, 122.2, 120.2, 118.2, 112.4, 98.8.

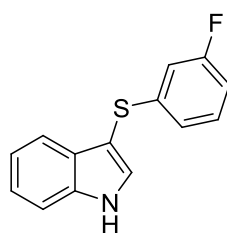

**3t**

**3-(3-Fluorophenylthio)-1H-indole (3t).**<sup>8</sup> Eluent: petroleum ether / ethyl acetate (10:1). White solid. <sup>1</sup>H NMR (DMSO-d<sub>6</sub>, 400 MHz) δ 11.85 (s, 1H), 7.85 (s, 1H), 7.51 (d, 2H, *J* = 45.6 Hz), 6.78-7.22 (m, 6H). <sup>13</sup>C NMR (DMSO-d<sub>6</sub>, 100 MHz) δ 162.5 (*J*<sub>CF</sub> = 244.6 Hz), 142.4 (*J*<sub>CF</sub> = 6.2 Hz), 136.8, 132.8, 130.5 (*J*<sub>CF</sub> = 9.1 Hz), 128.5, 122.3, 121.1, 120.3, 118.2, 112.5, 111.6 (*J*<sub>CF</sub> = 36.6 Hz), 111.5 (*J*<sub>CF</sub> = 7.1 Hz), 98.3.

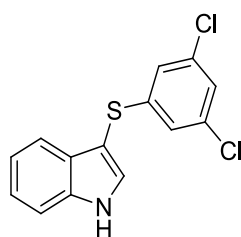

**3u**

**3-(3,5-Dichlorophenylthio)-1H-indole (3u) [New compound].** Eluent: petroleum ether / ethyl acetate (10:1). White solid. <sup>1</sup>H NMR (DMSO-d<sub>6</sub>, 400 MHz) δ 11.90 (s, 1H), 7.88 (d, 1H, *J* = 2.8 Hz), 7.56 (d, 1H, *J* = 8.0 Hz), 7.43 (d, 1H, *J* = 8.0 Hz), 7.28 (s, 1H), 7.24 (t, 1H, *J* = 7.6 Hz), 7.13 (t, 1H, *J* = 7.6 Hz), 6.99 (d, 2H, *J* = 1.6 Hz). <sup>13</sup>C NMR (DMSO-d<sub>6</sub>, 100 MHz) δ 144.3, 136.8, 134.5, 133.3, 128.1, 124.3, 123.0, 122.4, 120.5, 118.0, 112.6, 97.0. HRMS (EI) Calcd for C<sub>14</sub>H<sub>9</sub>NSCl<sub>2</sub> (M)<sup>+</sup> 292.9833; Found, *m/z* (%) = 292.9834 ([M]<sup>+</sup>, 100), 294.9809 ([M+2]<sup>+</sup>, 70.44).

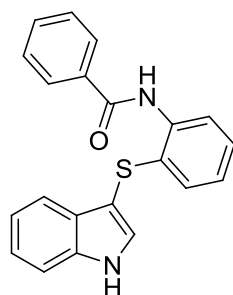

**3v**

**N-(2-(1H-indol-3-ylthio)phenyl)benzamide (3v) [New compound].** Eluent: petroleum ether / ethyl acetate (5:1). White solid. <sup>1</sup>H NMR (DMSO-d<sub>6</sub>, 400 MHz) δ 11.70 (s, 1H), 10.17 (s, 1H), 8.10 (d, 2H, *J* = 6.8 Hz), 7.75 (s, 1H), 7.57-7.62 (m, 3H), 7.51 (d, 1H, *J* = 8.0 Hz), 7.41 (t, 2H, *J* = 8.0 Hz), 7.19 (t, 1H, *J* = 8.0 Hz), 7.13 (t, 1H,

$J = 7.2$  Hz), 7.02-7.09 (m, 2H), 6.77 (d, 1H,  $J = 7.6$  Hz).  $^{13}\text{C}$  NMR (DMSO- $d_6$ , 100 MHz)  $\delta$  165.6, 136.8, 136.6, 134.3, 132.4, 131.7, 128.7, 128.5, 127.7, 127.6, 126.7, 126.5, 125.1, 122.1, 120.0, 118.4, 112.3, 99.2. HRMS (EI) Calcd for  $\text{C}_{21}\text{H}_{16}\text{N}_2\text{OS}$  (M)<sup>+</sup> 344.0983; Found, 344.0988.

## References

- (1) W. Ge and Y. Wei, *Green Chemistry*, 2012, 14, 2066-2070.
- (2) G. La Regina, V. Gatti, V. Famigliani, F. Piscitelli and R. Silvestri, *ACS Combinatorial Science*, 2012, 14, 258-262.
- (3) M. Tudge, M. Tamiya, C. Savarin and G. R. Humphrey, *Organic Letters*, 2006, 8, 565-568.
- (4) Y. Maeda, M. Koyabu, T. Nishimura and S. Uemura, *The Journal of Organic Chemistry*, 2004, 69, 7688-7693.
- (5) T. Wieland and K. Rühl, *Chemische Berichte*, 1963, 96, 260-265.
- (6) S. Ranjit, R. Lee, D. Heryadi, C. Shen, J. E. Wu, P. Zhang, K.-W. Huang and X. Liu, *The Journal of Organic Chemistry*, 2011, 76, 8999-9007.
- (7) J. Porter, S. Lumb, R. J. Franklin, J. M. Gascon-Simorte, M. Calmiano, K. L. Riche, B. Lallemand, J. Keyaerts, H. Edwards, A. Maloney, J. Delgado, L. King, A. Foley, F. Lecomte, J. Reuberson, C. Meier and M. Batchelor, *Bioorganic & Medicinal Chemistry Letters*, 2009, 19, 2780-2784.
- (8) X.-L. Fang, R.-Y. Tang, P. Zhong and J.-H. Li, *Synthesis*, 2009, **2009**, 4183-4189.
- (9) D. H. R. Barton, X. Lusinchi and P. Milliet, *Tetrahedron*, 1985, **41**, 4727-4738.
- (10) Z. Li, L. Hong, R. Liu, J. Shen and X. Zhou, *Tetrahedron Letters*, 2011, **52**, 1343-1347.

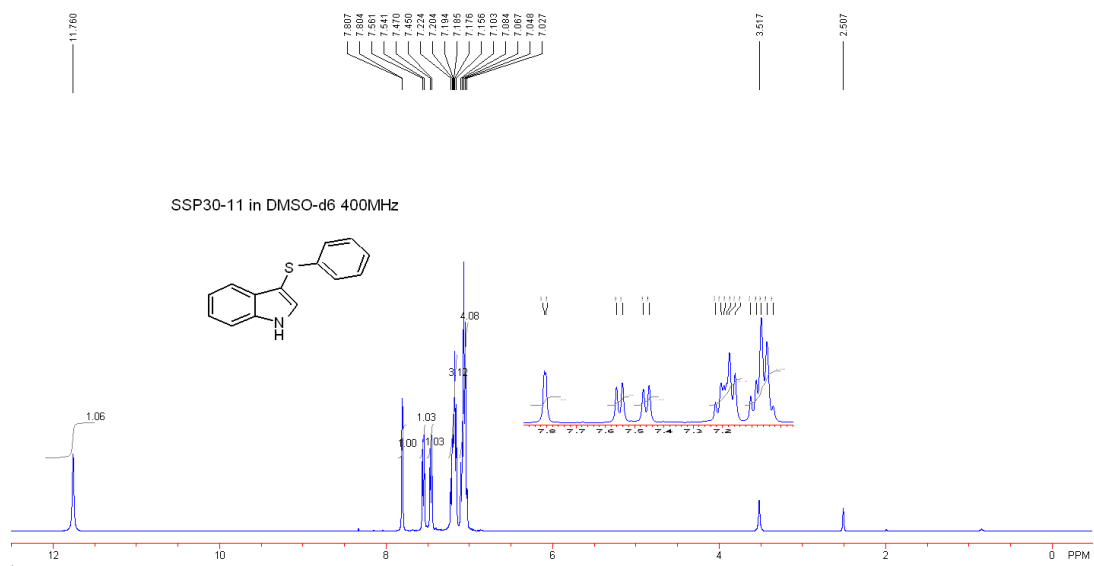

$^1\text{H}$  NMR of product **3a**

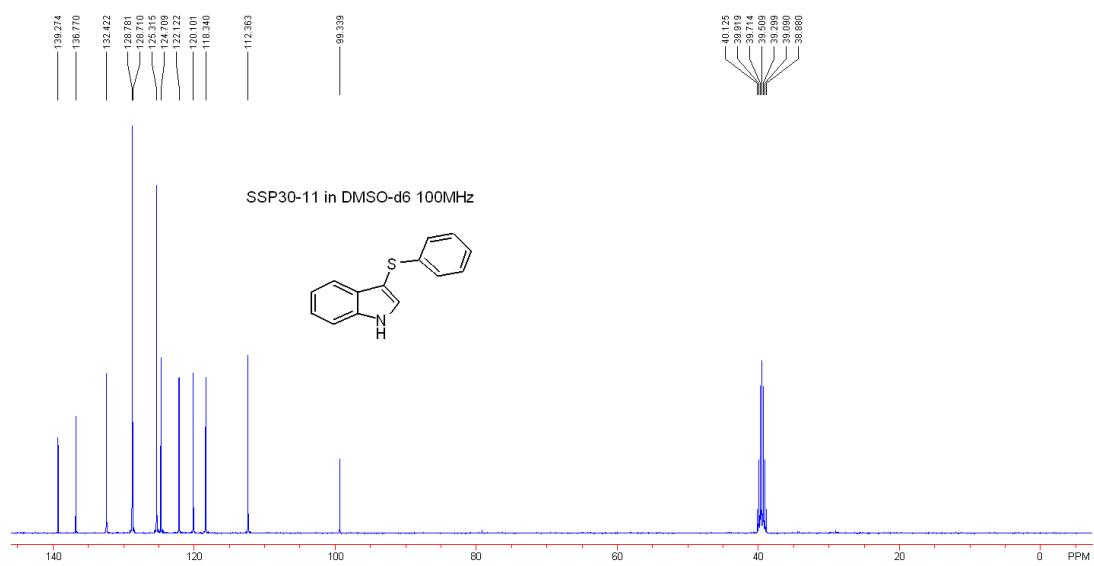

$^{13}\text{C}$  NMR of product **3a**

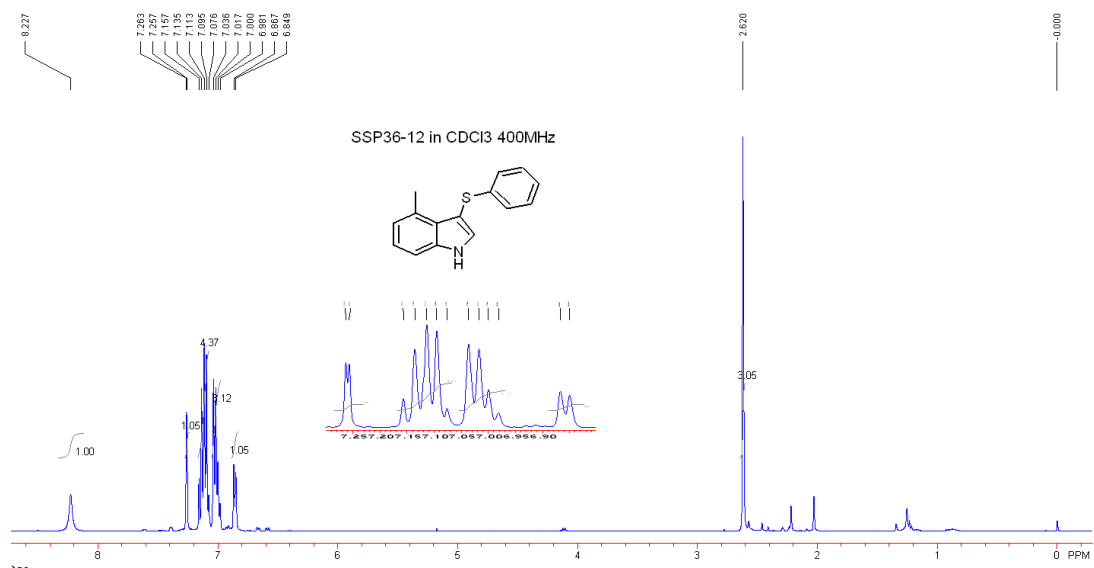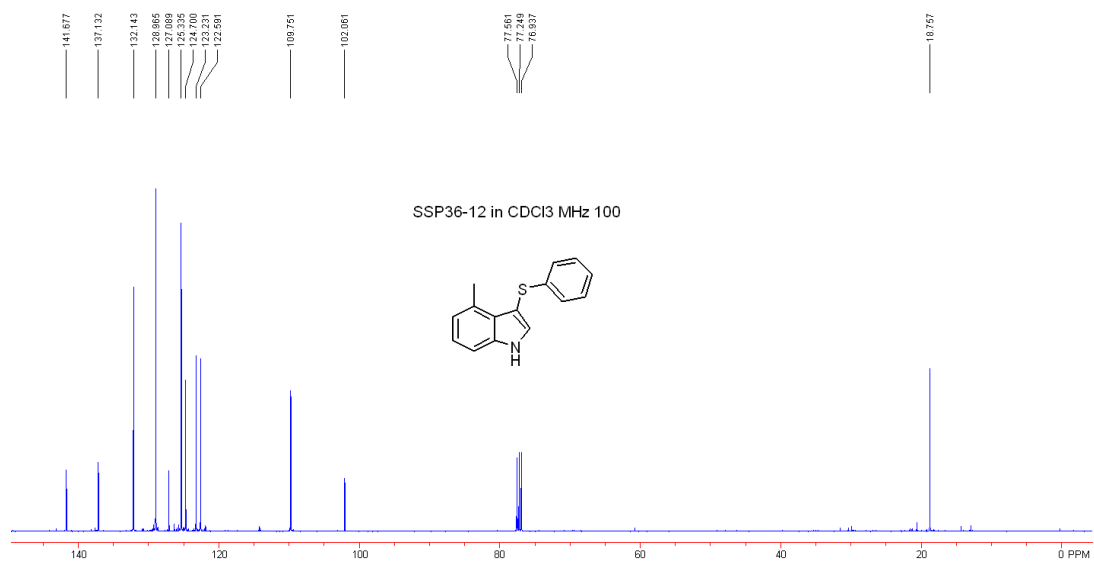

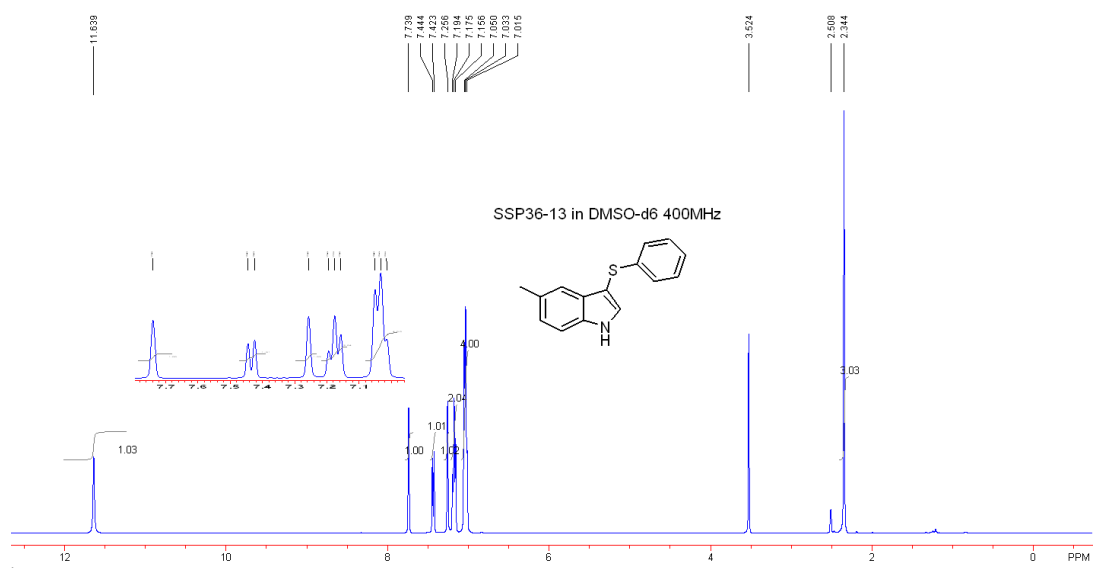

**<sup>1</sup>H NMR of product 3c**

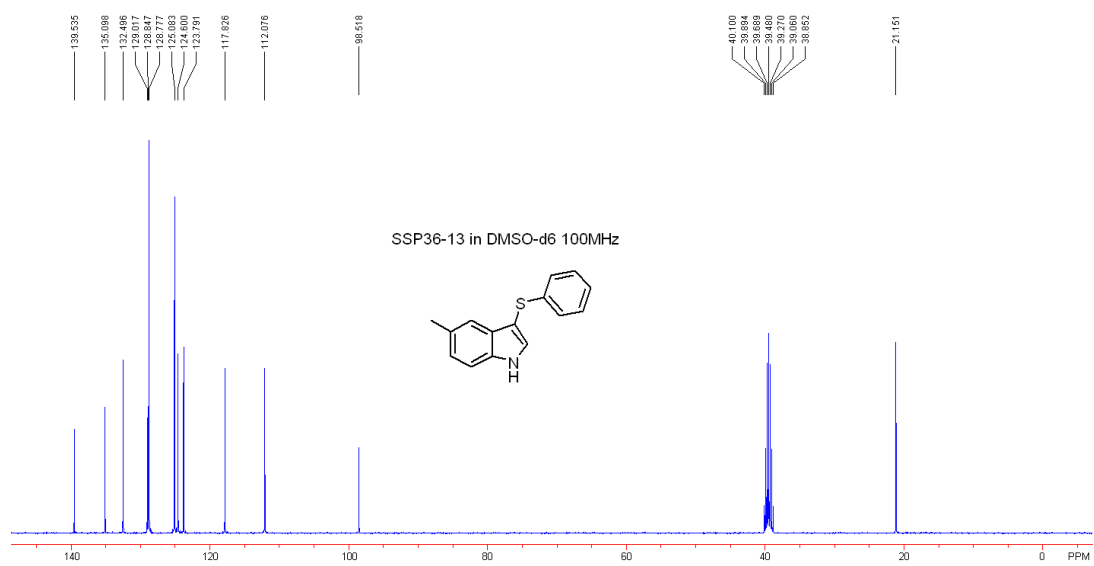

**<sup>13</sup>C NMR of product 3c**

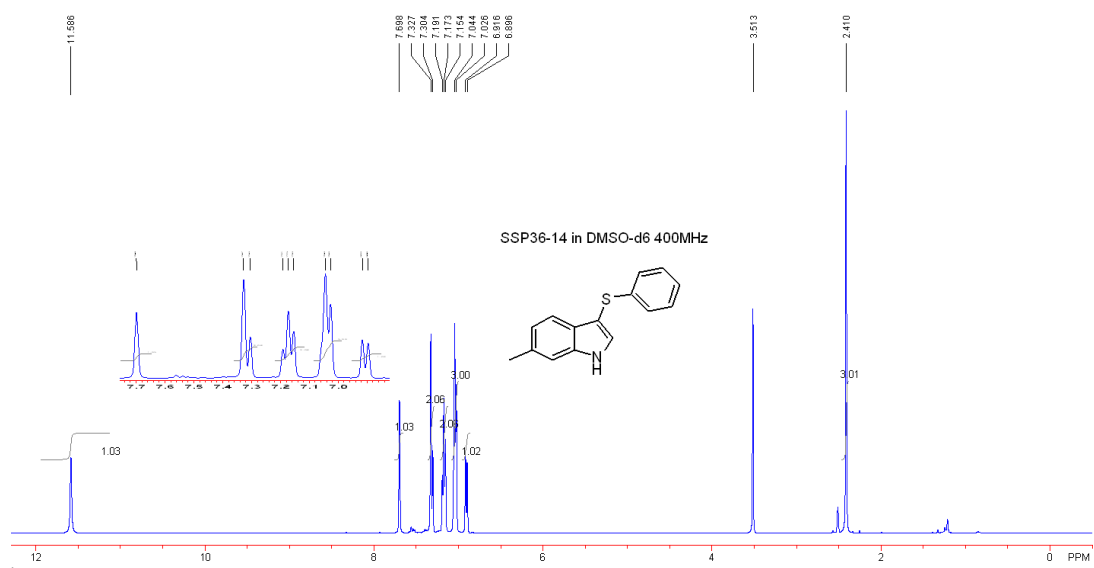

**<sup>1</sup>H NMR of product 3d**

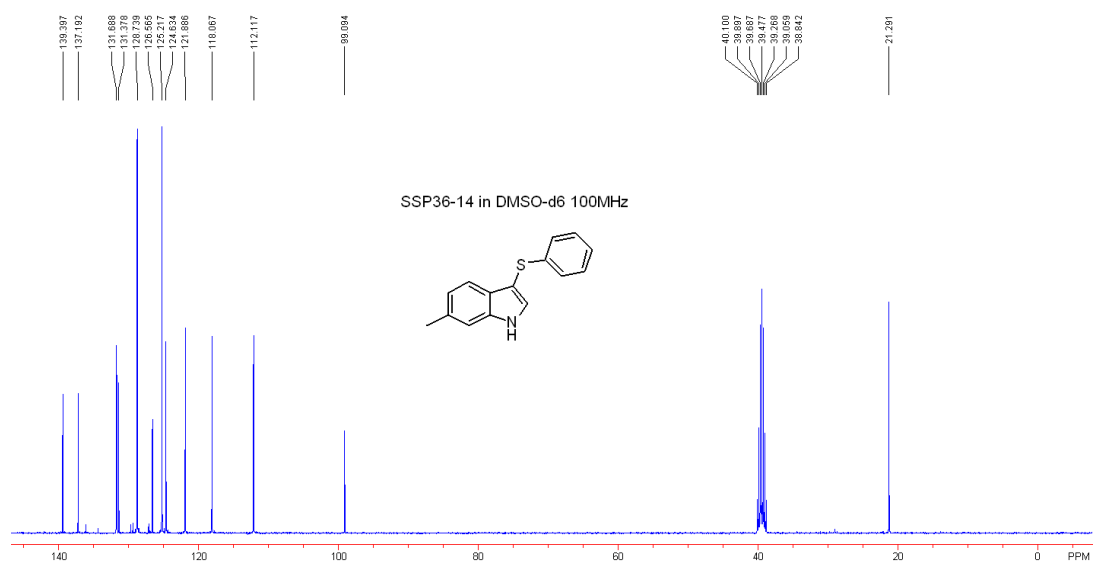

**<sup>13</sup>C NMR of product 3d**



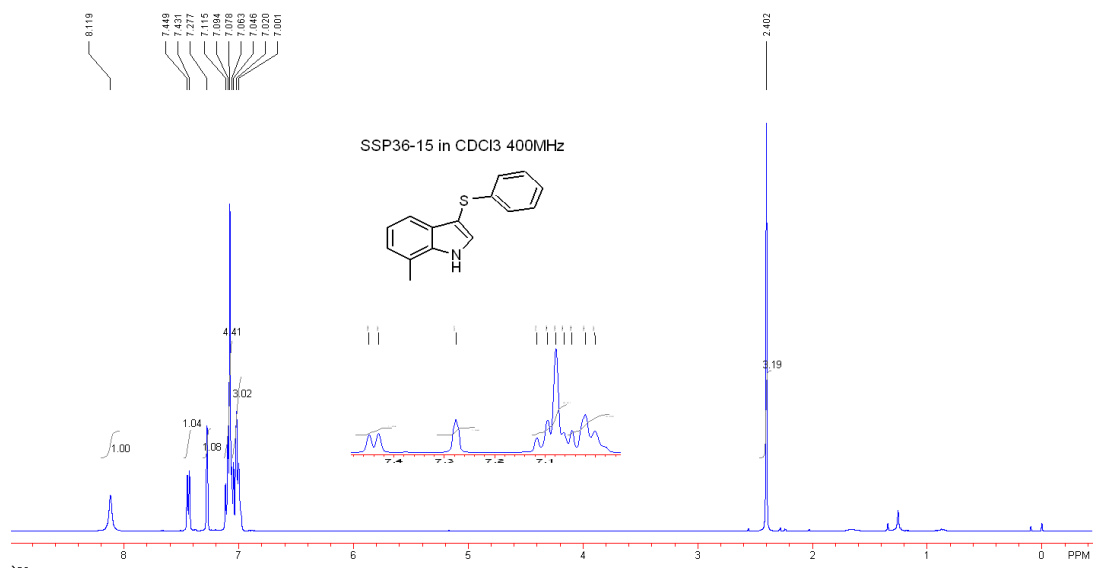

**<sup>1</sup>H NMR of product 3e**

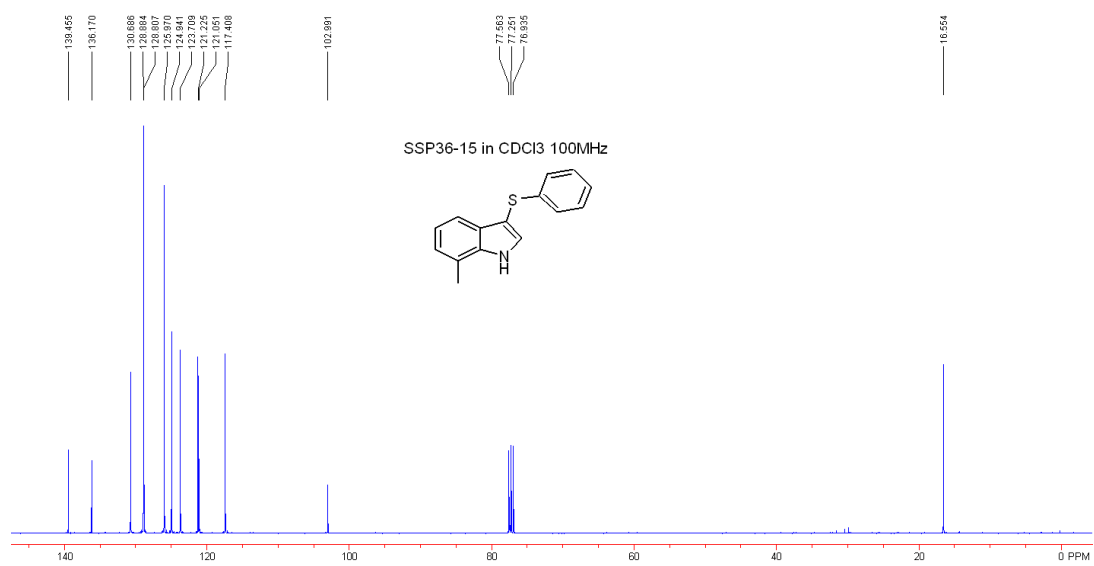

**<sup>13</sup>C NMR of product 3e**

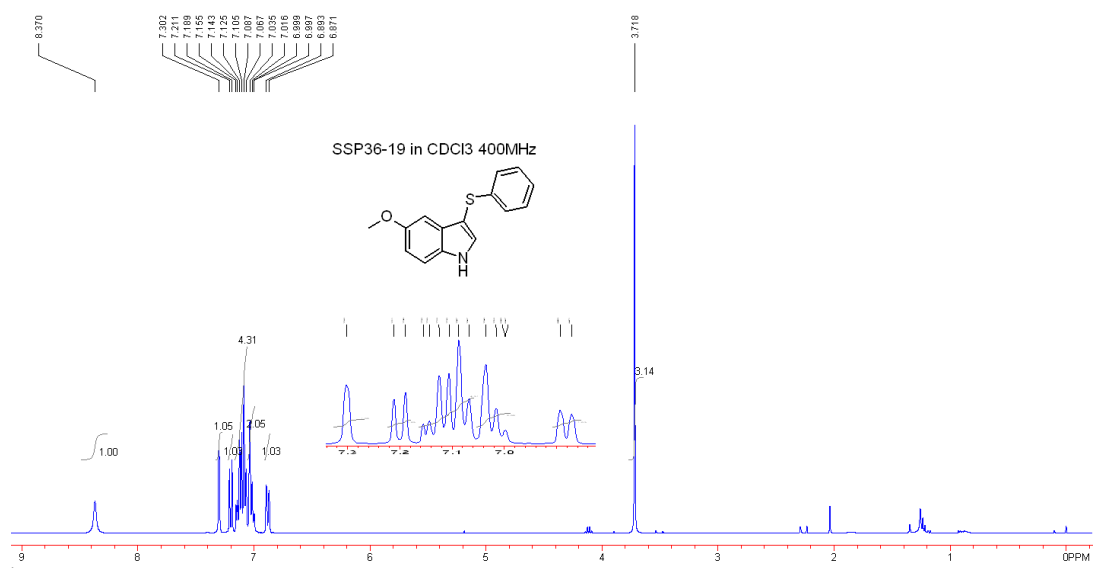

**<sup>1</sup>H NMR of product 3f**

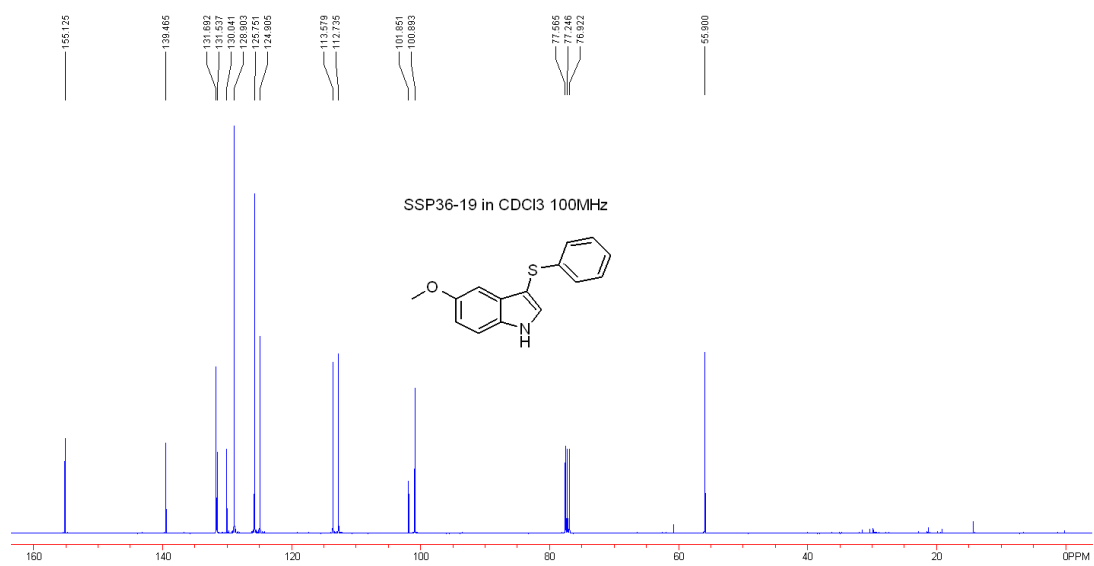

**<sup>13</sup>C NMR of product 3f**

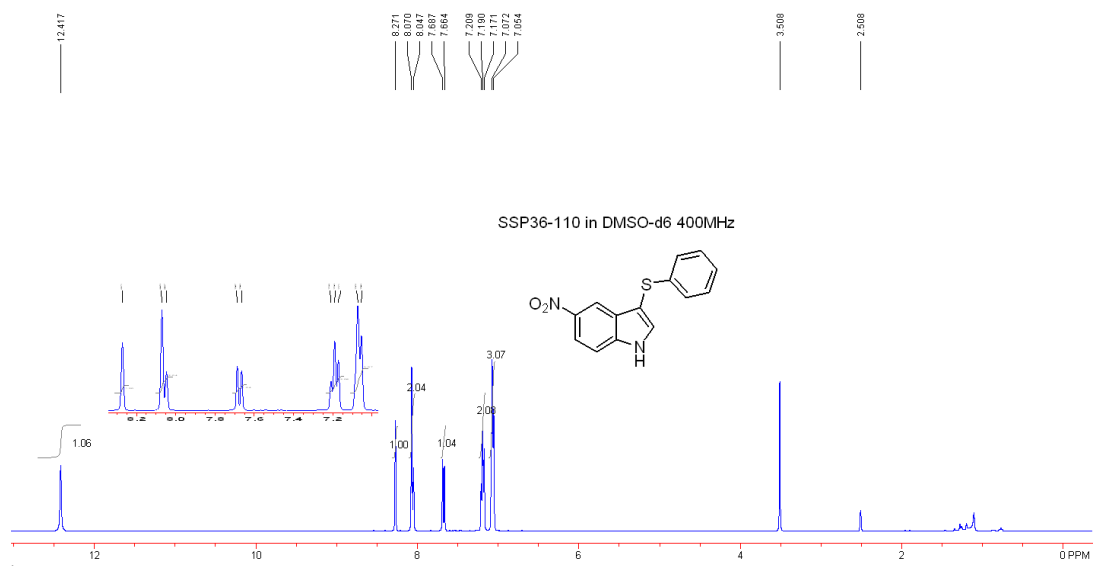

**<sup>1</sup>H NMR of product 3g**

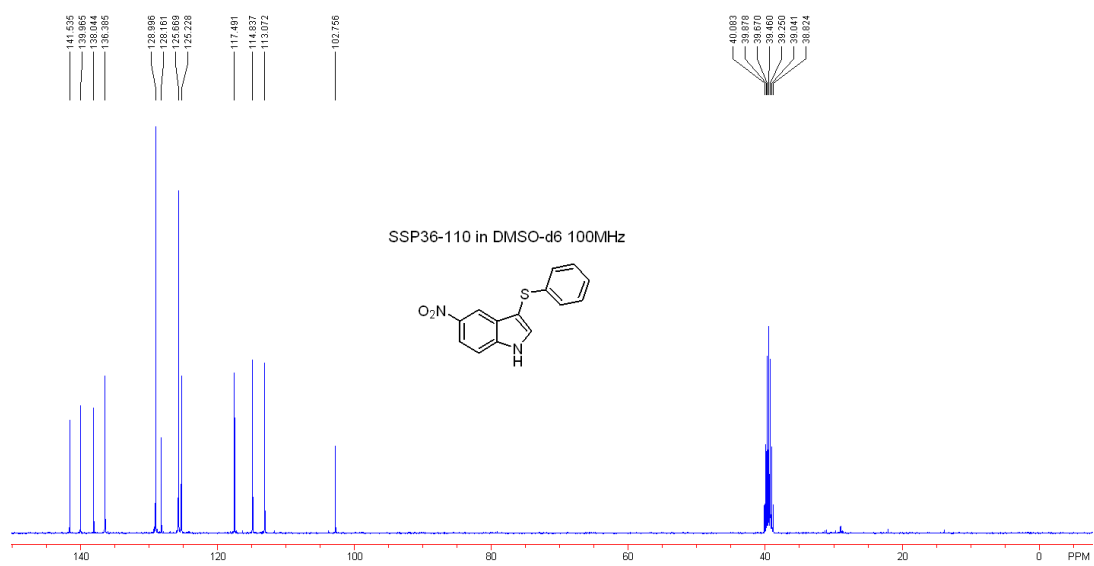

**<sup>13</sup>C NMR of product 3g**



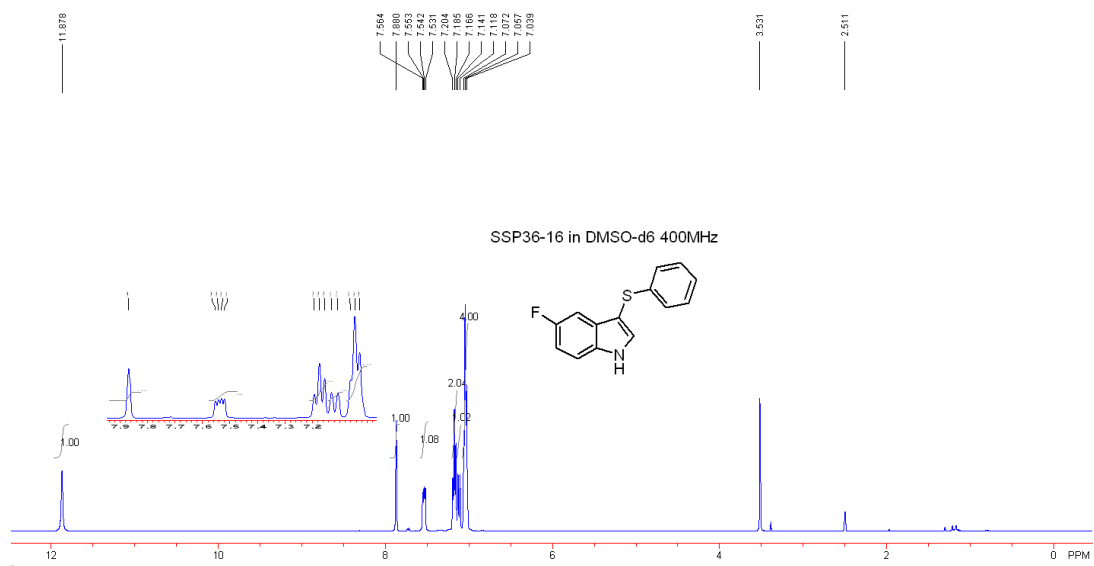

**<sup>1</sup>H NMR of product 3i**

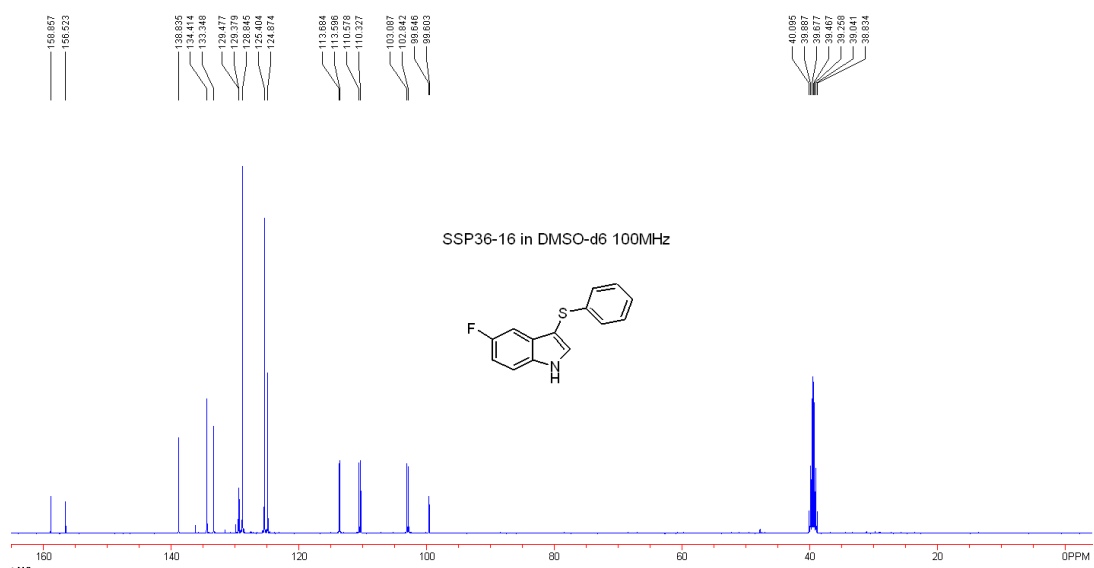

**<sup>13</sup>C NMR of product 3i**

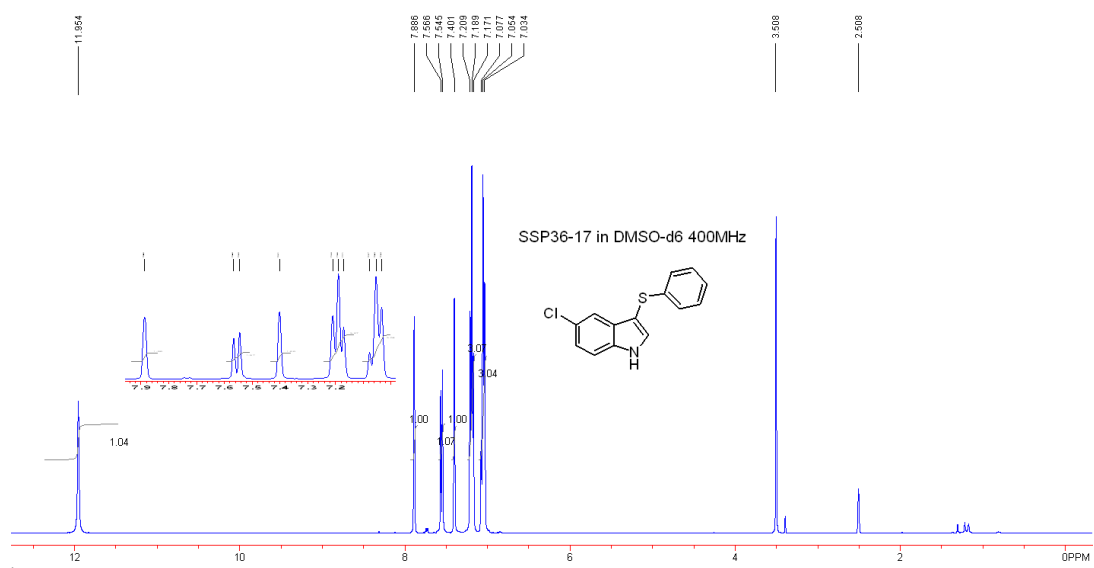

**<sup>1</sup>H NMR of product 3j**

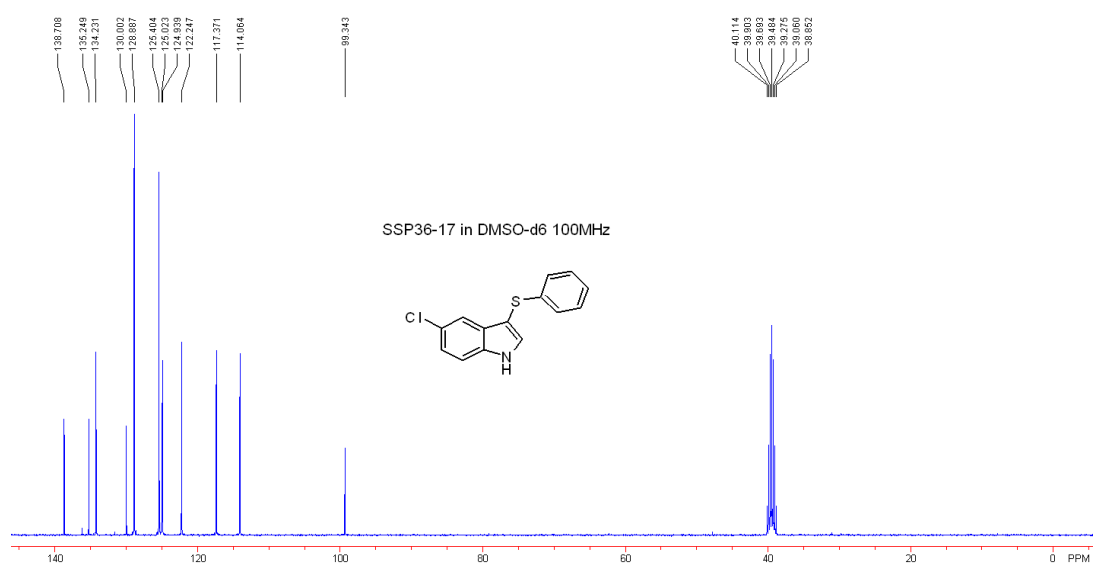

**<sup>13</sup>C NMR of product 3j**

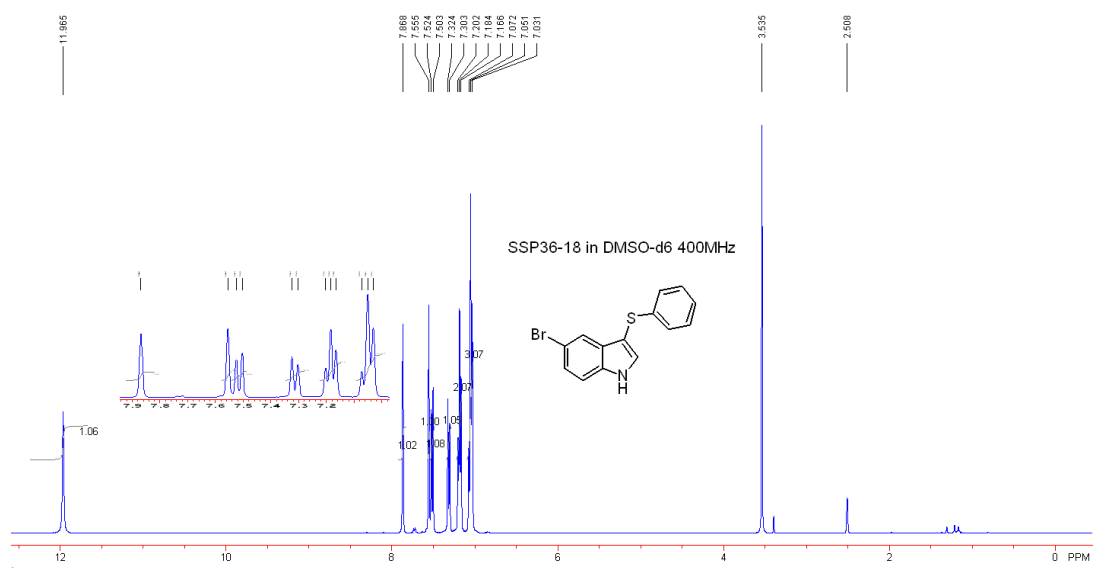

**<sup>1</sup>H NMR of product 3k**

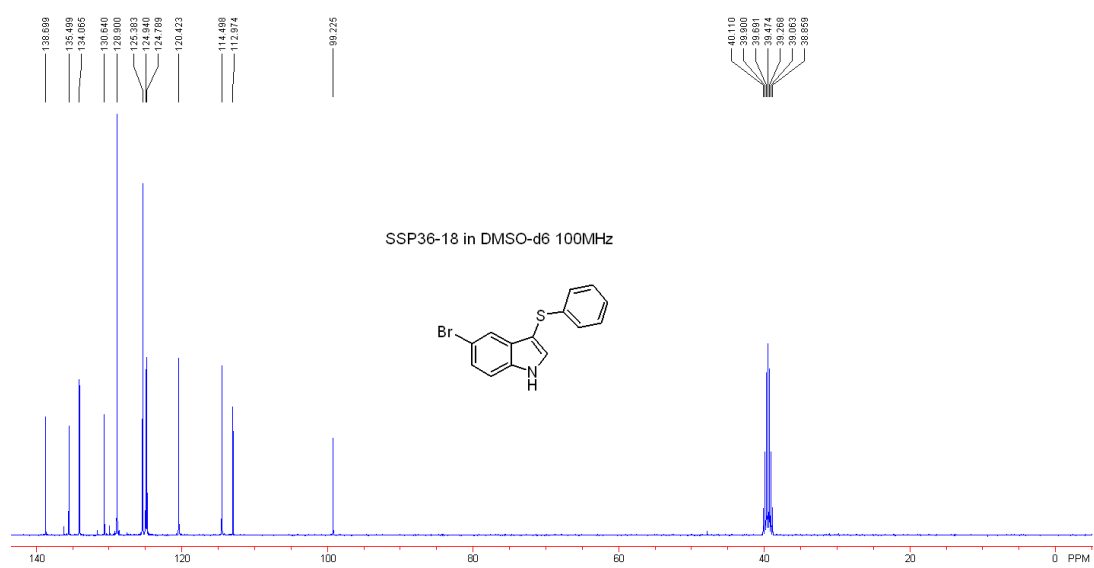

**<sup>13</sup>C NMR of product 3k**

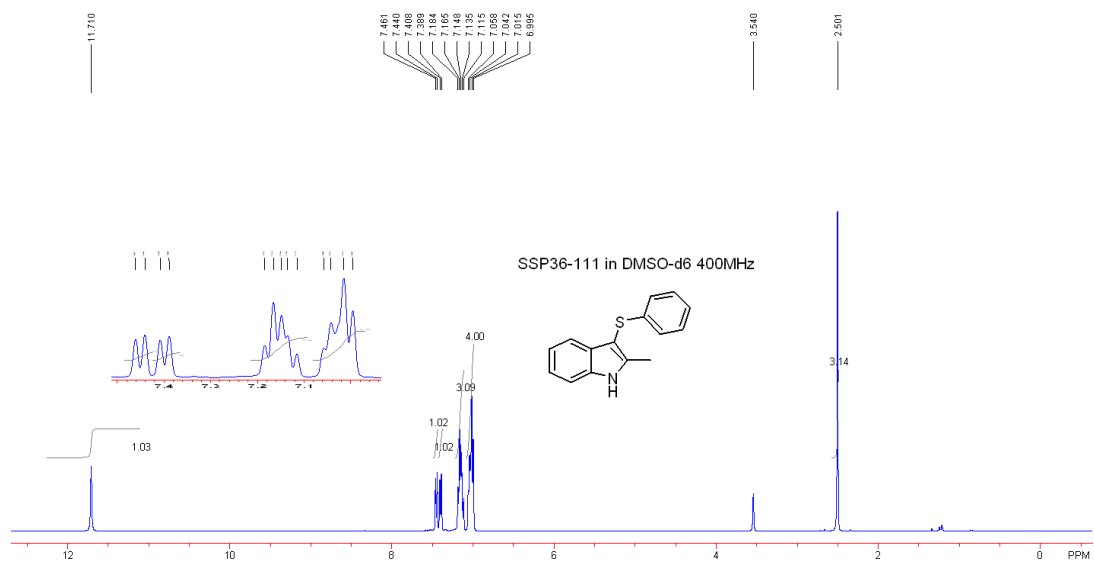

**<sup>1</sup>H NMR of product 3l**

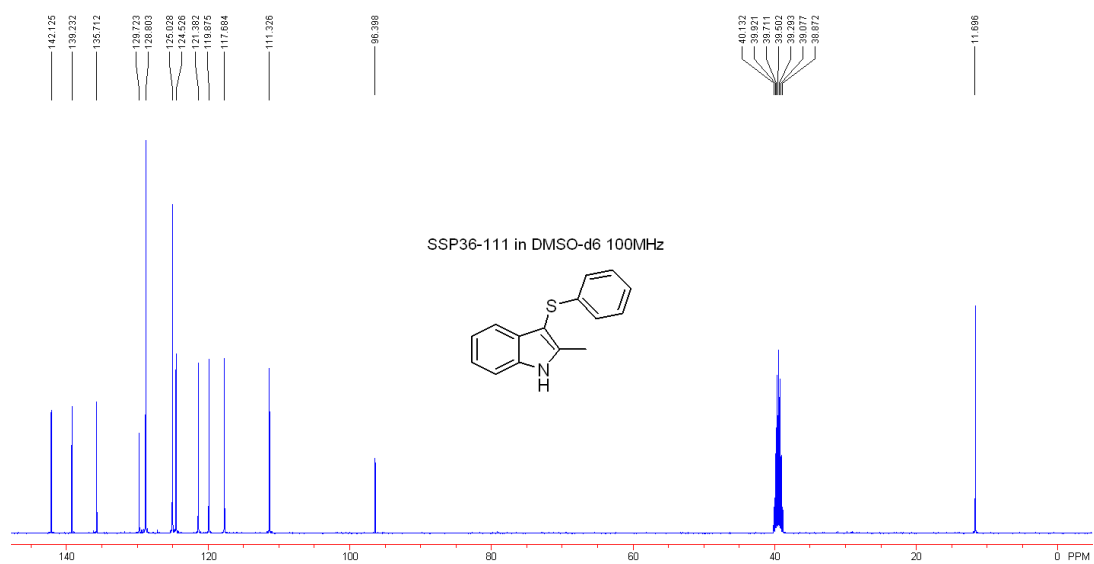

**<sup>13</sup>C NMR of product 3l**



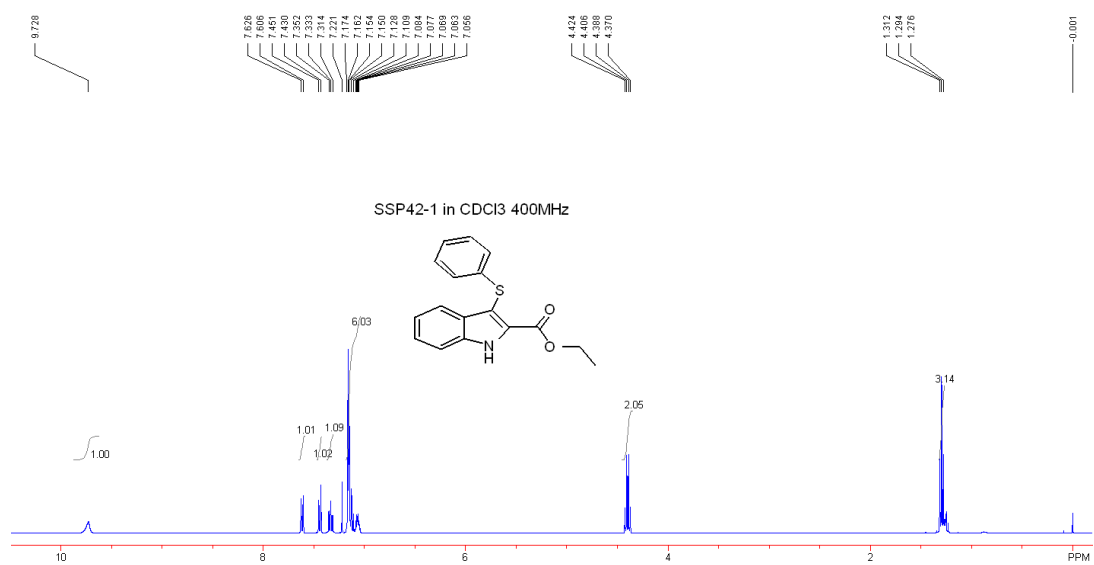

**<sup>1</sup>H NMR of product 3m**

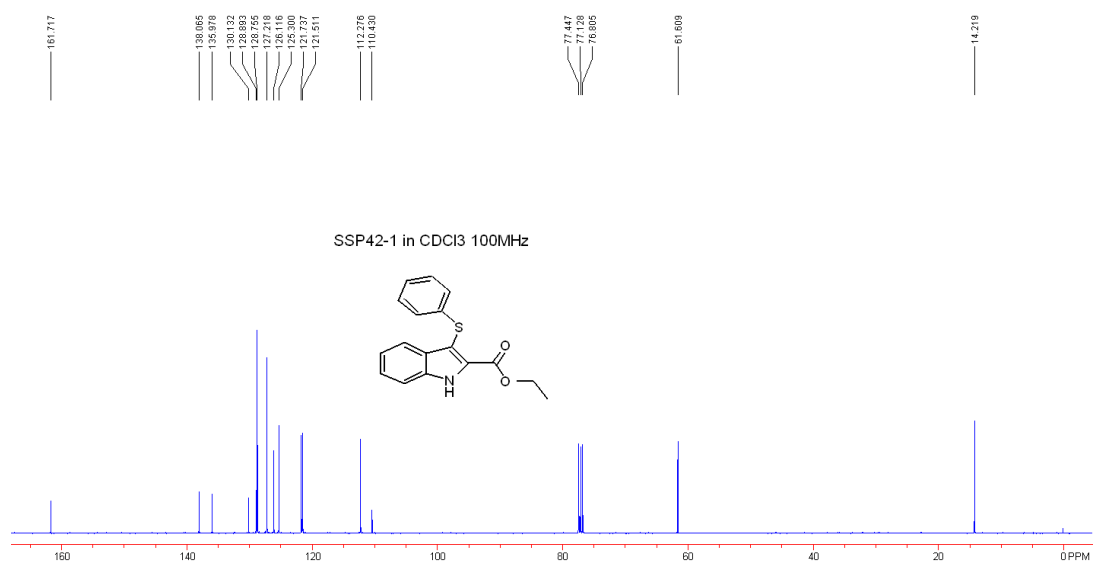

**<sup>13</sup>C NMR of product 3m**

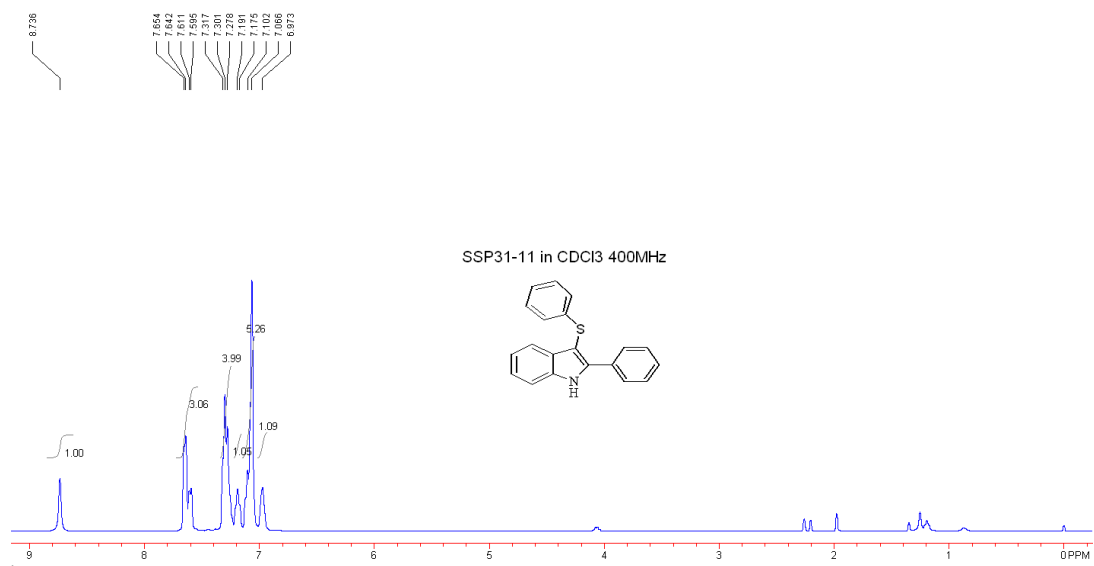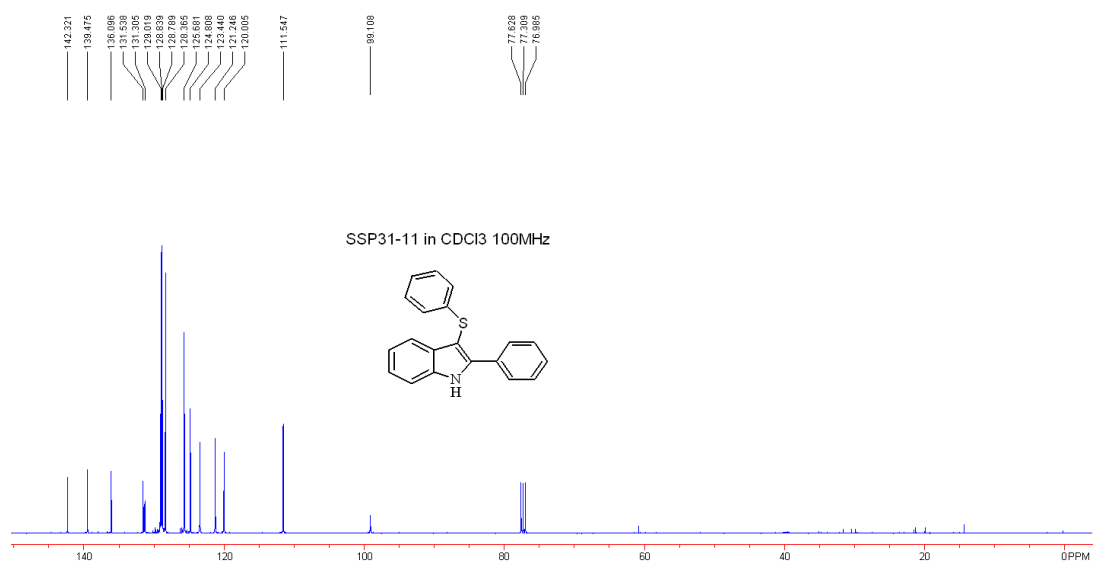

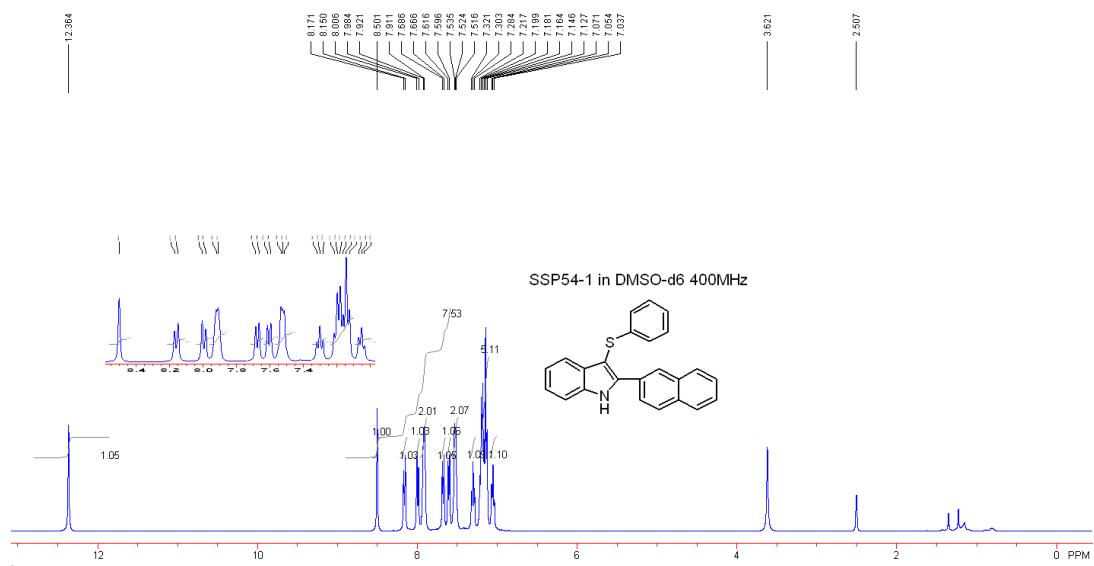

**<sup>1</sup>H NMR of product 3o**

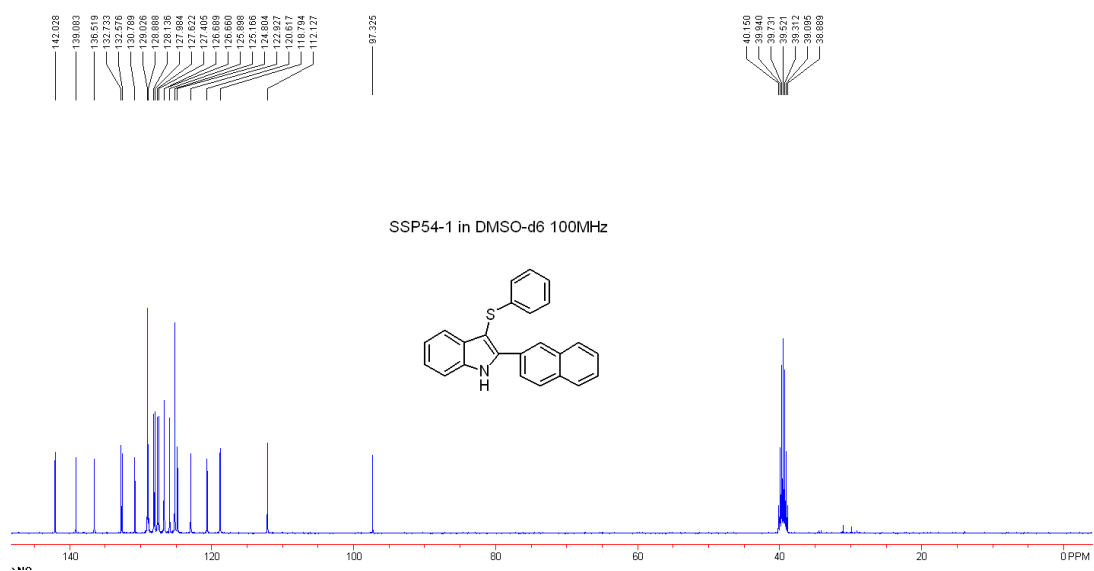

**<sup>13</sup>C NMR of product 3o**

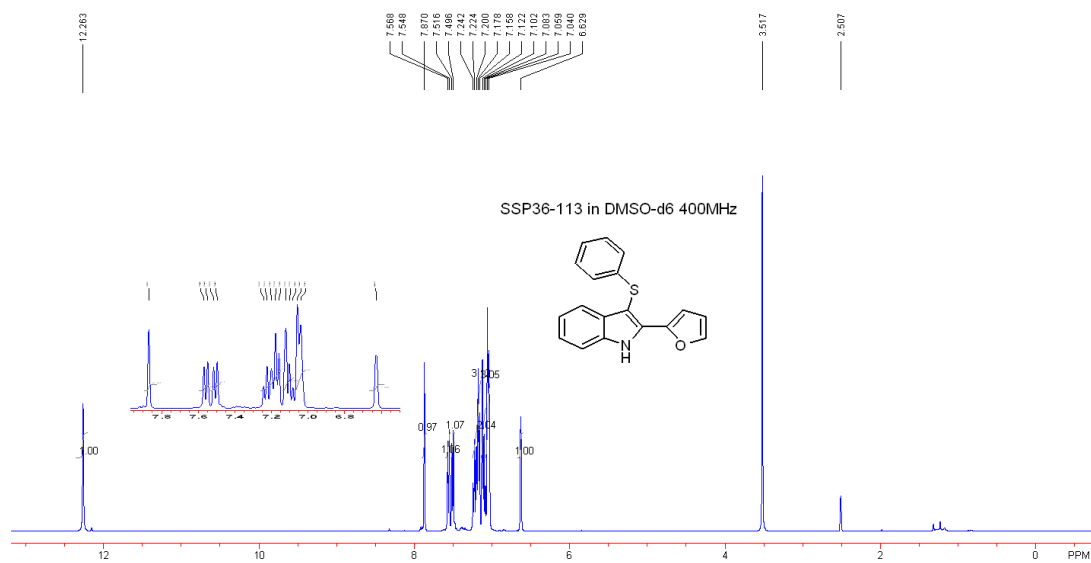

**<sup>1</sup>H NMR of product 3p**

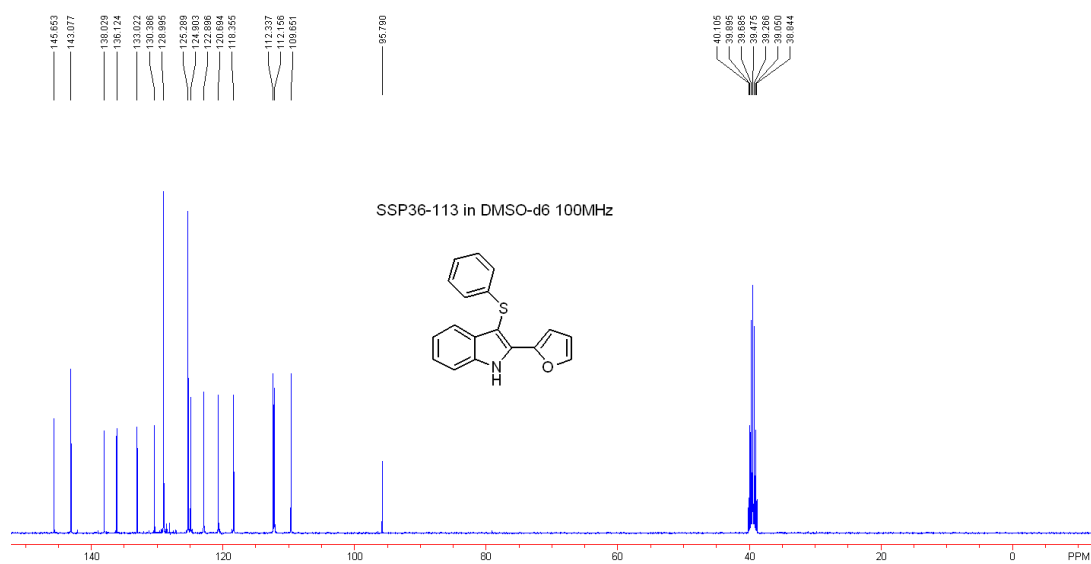

**<sup>13</sup>C NMR of product 3p**

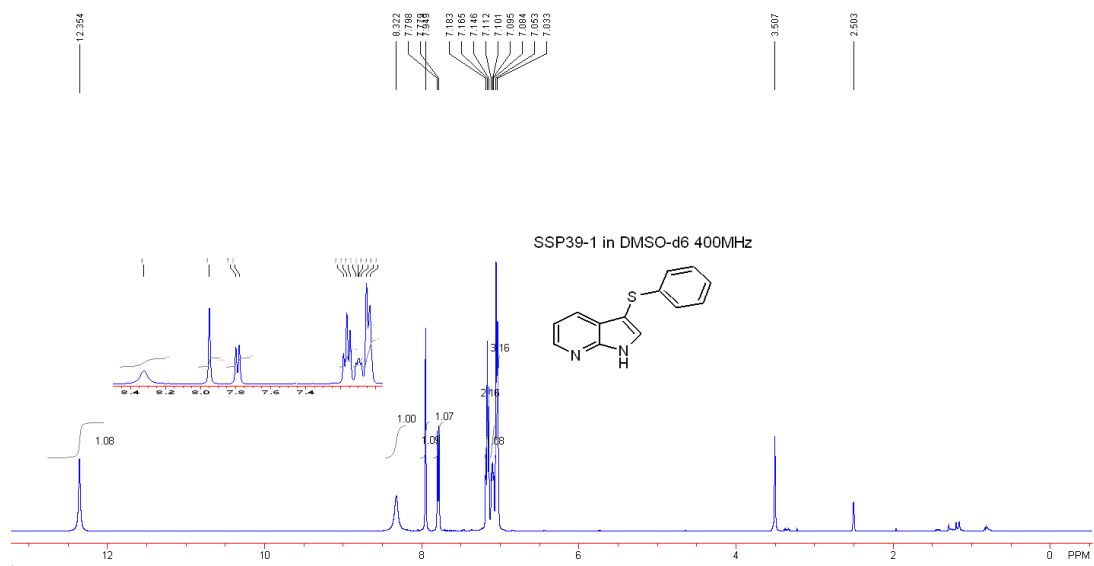

**<sup>1</sup>H NMR of product 3q**

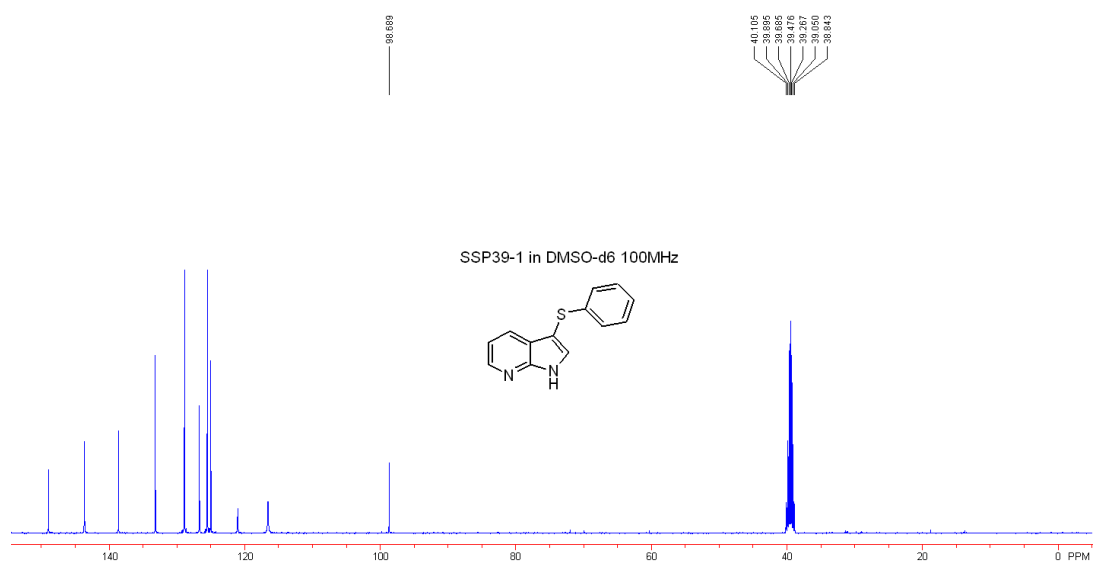

**<sup>13</sup>C NMR of product 3q**

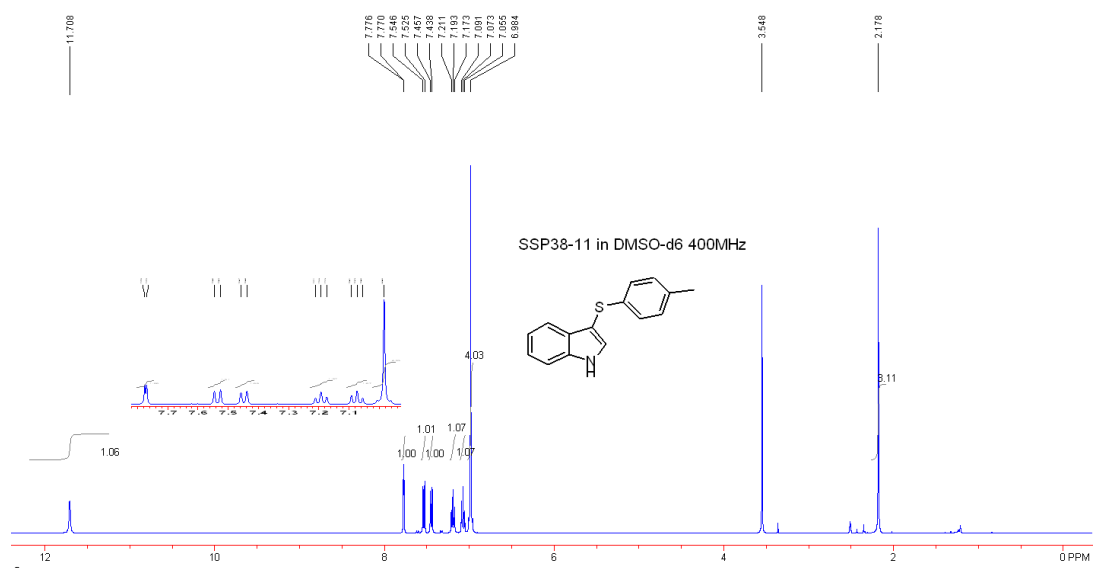

**<sup>1</sup>H NMR of product 3r**

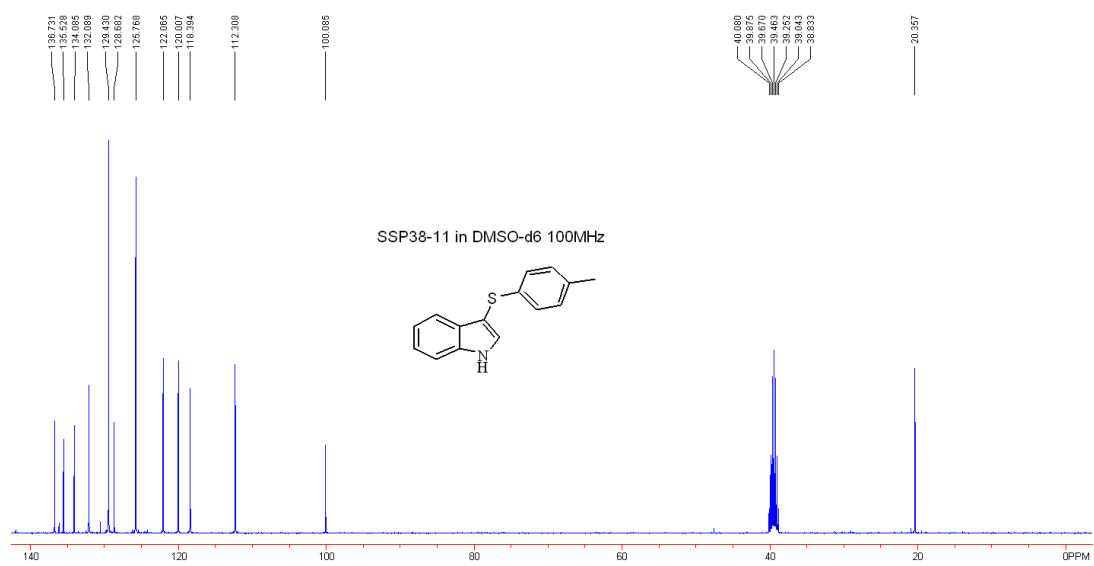

**<sup>13</sup>C NMR of product 3r**

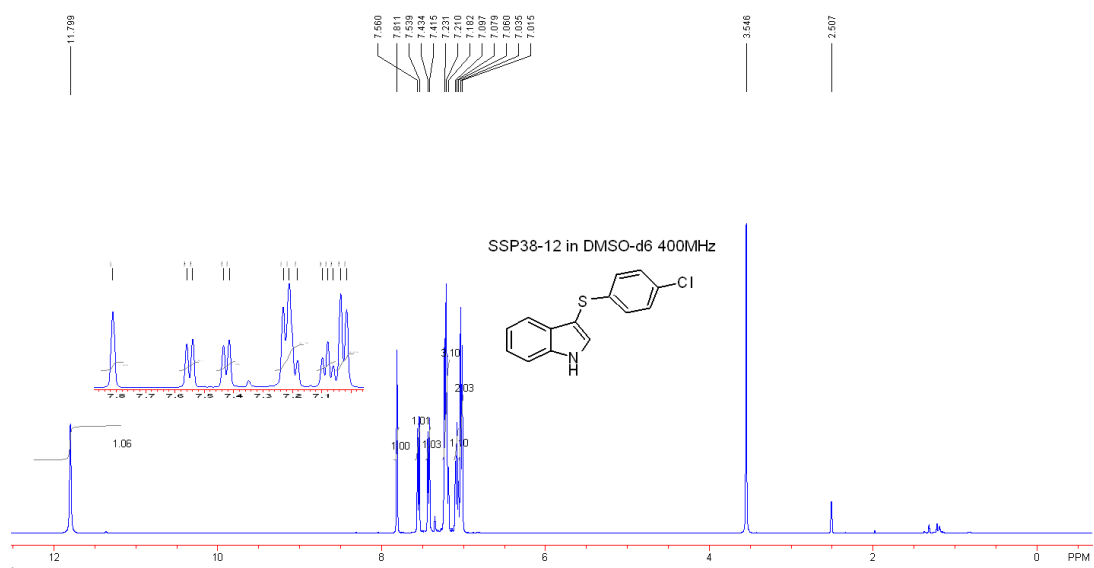

**<sup>1</sup>H NMR of product 3s**

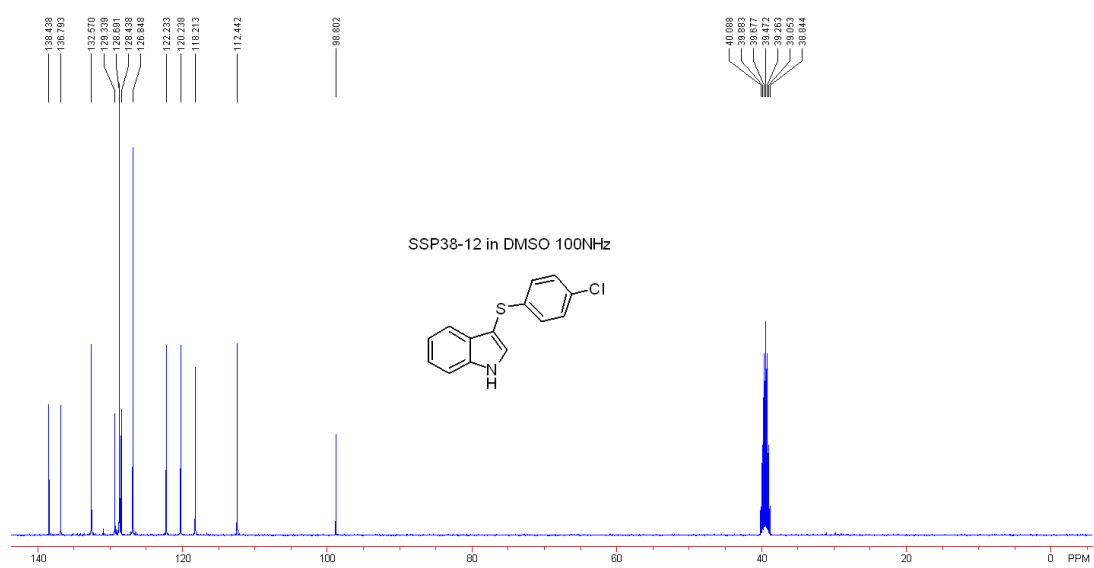

**<sup>13</sup>C NMR of product 3s**

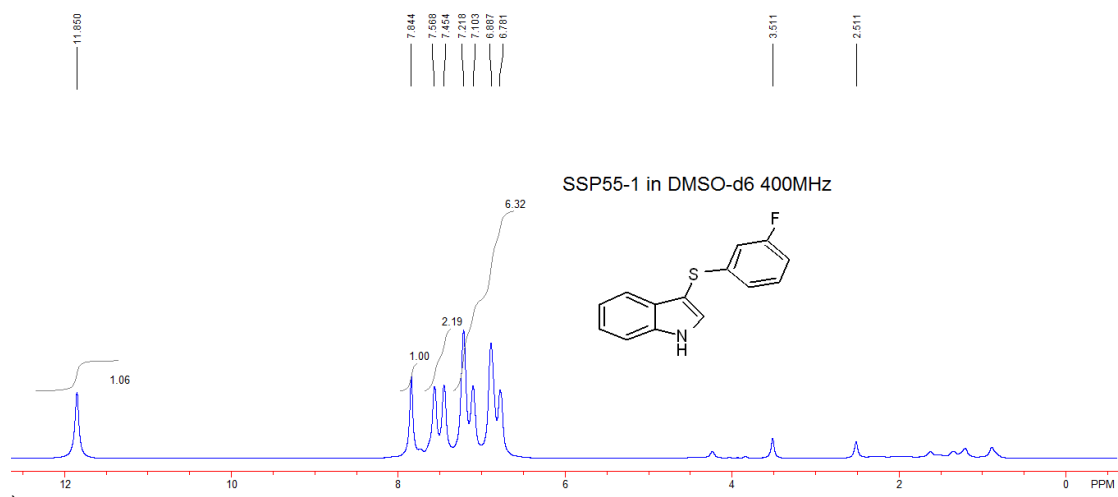

**<sup>1</sup>H NMR of product 3t**

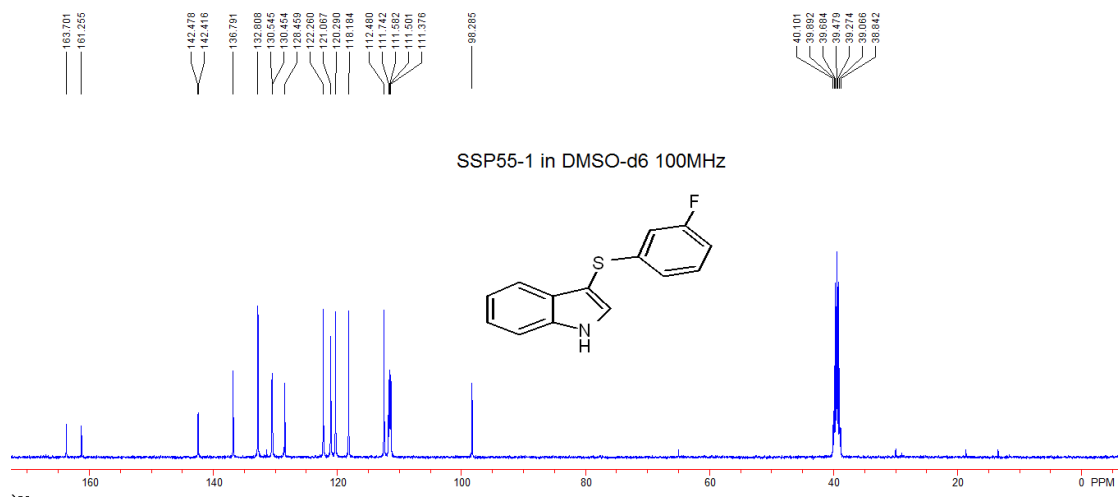

**<sup>13</sup>C NMR of product 3t**

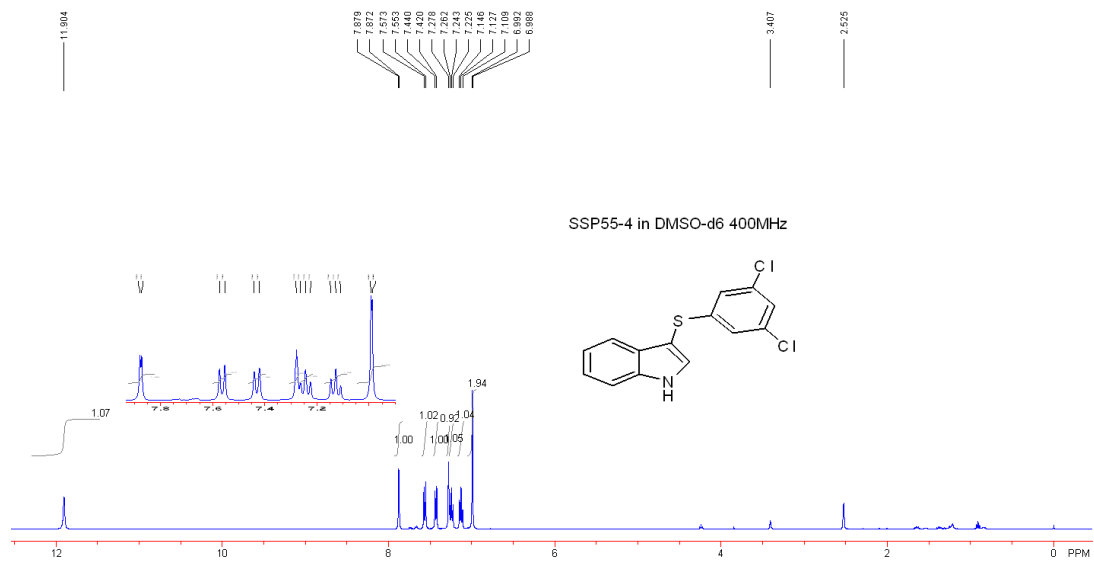

**<sup>1</sup>H NMR of product 3u**



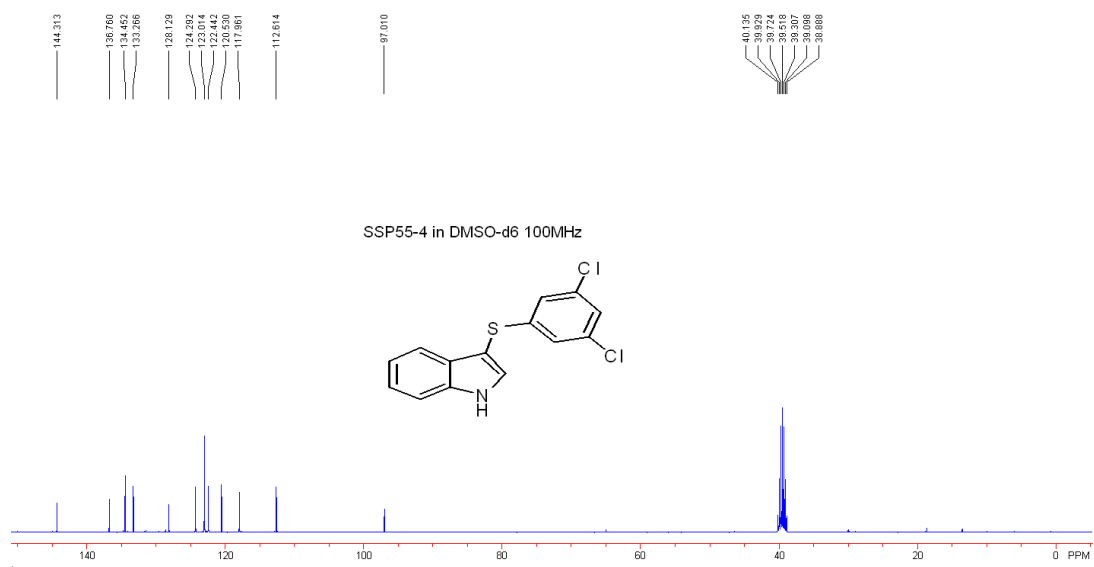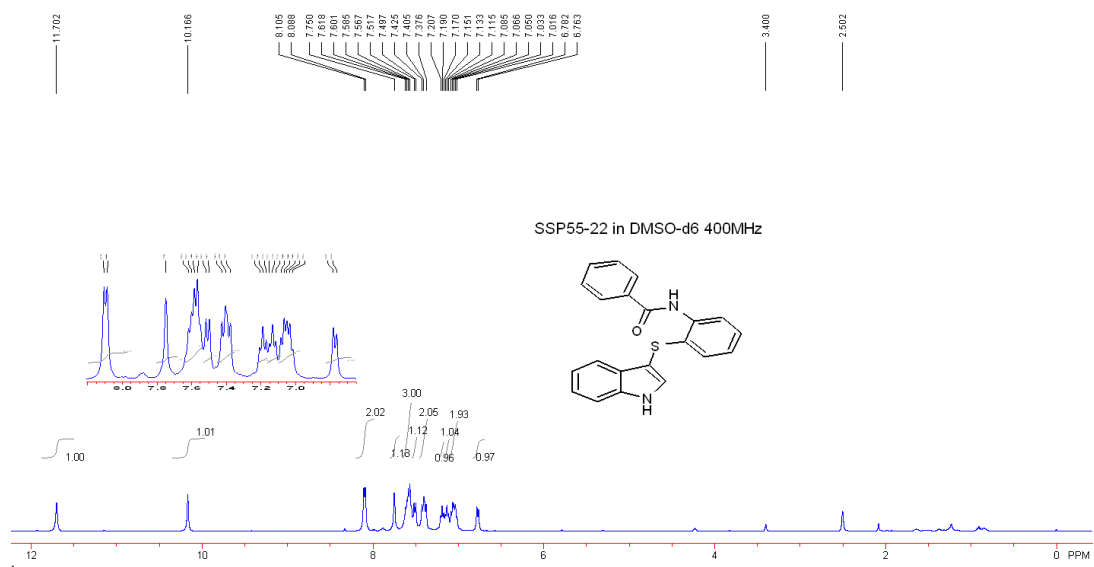

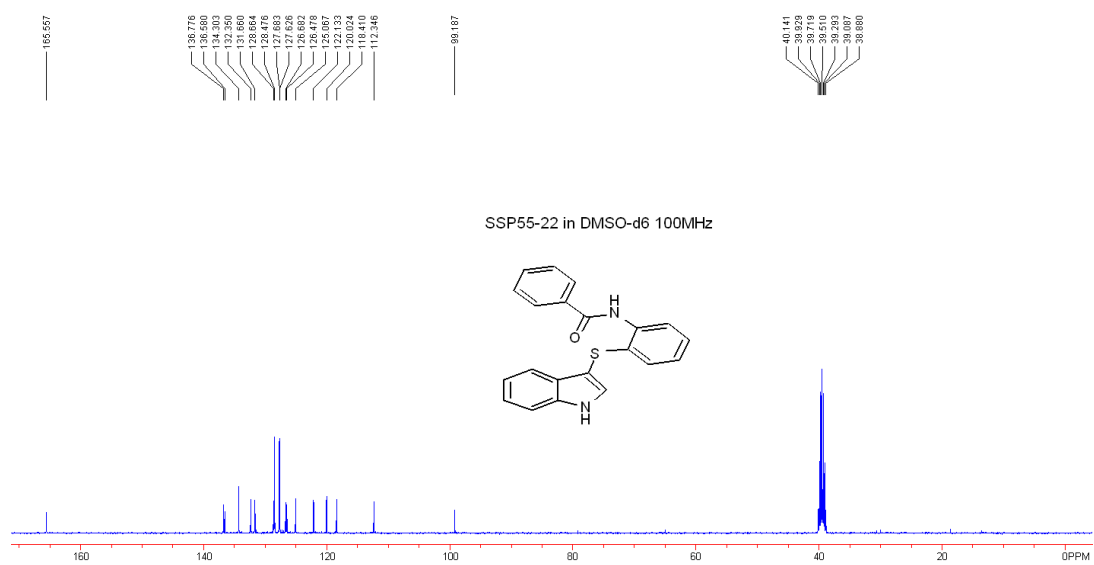

<sup>13</sup>C NMR of product 3v
